# 1 **Differential Regulation of Rice Transcriptome to *Rhizoctonia solani* infection**

2  
3  
4 **Short Title:** Rice response to *R. solani* infection

## 5 6 7 **All author names and affiliations**

8 Akash Das<sup>1</sup>, Moin Mazahar<sup>2</sup>, Ankur Sahu<sup>1,3</sup>, Mrinmoy Kshattray<sup>1</sup>, P.B. Kirti<sup>4\*</sup>, Pankaj Barah<sup>1\*</sup>

9  
10 <sup>1</sup>Department of Molecular Biology and Biotechnology, Tezpur University, Assam- 784028, India

11 <sup>2</sup>Department of Biotechnology, Indian Institute of Rice research, Hyderabad- 500030, India

12 <sup>3</sup>Leibniz Institute of Plant Genetics and Crop Plant Research (IPK), Gatersleben Seeland- 06466,  
13 Germany

14 <sup>4</sup>Agri Biotech Foundation, PJTS Agricultural University Campus, Hyderabad- 500030, India

## 15 16 17 **Corresponding author's details**

18 Pankaj Barah: Department of Molecular Biology and Biotechnology, Tezpur University, Assam-  
19 784028, India

20 P.B. Kirti: Agri Biotech Foundation, PJTS Agricultural University Campus, Hyderabad- 500030,  
21 India

## 22 23 24 **One sentence summary**

25 Time series expression analysis of rice variety BPT-5204 identifies key molecular signatures  
26 involved in rice plant response to *R. solani* infection.

## 27 28 29 **Keywords**

30 Systems Biology, RNA-Seq, Machine Learning, Transcriptomics, Rice, *Rhizoctonia solani*,  
31 Sheath Blight, Transcriptional Regulatory Networks.

38 **Author contributions**

39 P.B. and P.B.K conceived the project, designed the experiments; M.M. performed  
40 the experiments; A.D., A.S. and P.B. analyzed the data; M.K. performed the  
41 regulatory network analysis. A.D., P.B., A.S., M.M. and P.B.K. prepared the  
42 manuscript. P.B. agrees to serve as the author responsible for contact and ensures  
43 communication.

44

45

46 **Corresponding author email:**

47 Pankaj Barah, E mail: barah@tezu.ernet.in

48 P.B Kirti, E mail: pbkirti@uohyd.ac.in

49

50

51

52

53

54

55

56

57

58

59

60

61

62

63

64

65

66

67

68

69

70

71

72

## 73 **ABSTRACT**

74 Sheath Blight (SB) disease in rice crop caused by the infection of the fungal pathogen  
75 *Rhizoctonia solani* (*R. solani*) is one of the severe rice diseases that can cause up to 50% yield  
76 losses. Naturally occurring rice varieties resistant to SB have not been reported yet. We have  
77 performed a Time-Series RNA-Seq analysis on a widely cultivated rice variety BPT-5204 for  
78 identifying its transcriptomic response signatures to *R. solani* infection at 1<sup>st</sup>, 2<sup>nd</sup> and 5<sup>th</sup> day post  
79 inoculation (dpi). In total, 428, 3225 and 1225 genes were differentially expressed in the treated  
80 rice plants post 1, 2 and 5 dpi, respectively. GO and KEGG enrichment analysis identified  
81 significant processes and pathways differentially altered in the rice plant after the fungal  
82 infection. Machine learning and network based integrative approach was used to construct  
83 Transcriptional Regulatory Networks (TRNs) of the rice plant at the three Time Points.  
84 Regulatory network analysis identified SUB1B, MYB30 and CCA1 as important regulatory hub  
85 Transcription Factors in rice during *R. solani* infection. Jasmonic acid signaling pathway was  
86 activated and in contrast, photosynthesis and carbon fixation processes were significantly  
87 compromised. Involvement of MAPK, CYPs, Peroxidases and PAL genes was observed in  
88 response to the fungal infection. Circadian clock was also strongly influenced by *R. solani*  
89 infection. Our integrative analysis identified 7 putative SB resistant genes altered in rice after *R.*  
90 *solani* infection and provided a better understanding of rice plant response to *R. solani* infection.

91

## 92 **INTRODUCTION**

93 Rice Sheath Blight (SB) disease is one among the top three most devastating diseases of  
94 rice worldwide. It can cause up to 50 % of yield losses under optimal environmental conditions  
95 (Qingzhong et al., 2001). This disease is caused by a wide host range fungal pathogen,  
96 *Rhizoctonia solani*. The fungus is a soil borne necrotroph, divided into 14 anastomical groups  
97 (AG1 to AG13) based on the diversity in colony morphology, biochemical and molecular  
98 markers, pathogenicity, and aggressiveness. Subgroup AG1-1A is responsible for causing Sheath  
99 blight disease (Yuan et al., 2018). The primary source of inoculum is the load of sclerotia left  
100 over from the previous harvest, which later affects the forthcoming season upon activation by  
101 optimum environmental conditions. Contaminated water transmission for irrigation purposes  
102 paves the way for greater spread from one field to the others (Kobayashi et al., 1997).  
103 Unfortunately, naturally occurring rice germplasm showing absolute resistance to this  
104 catastrophic disease does not exist and the control of the disease lies solely in the use of  
105 appropriate fungicides.

106 The rapid increase in population and global climate change affect the food security  
107 demands, which necessitate immediate attention. Predictions are made that rice prices can surge  
108 by 37% by the year 2050 as a result of climate change that results in significant reduction in total  
109 rice yields by 14, 10 and 15% in South Asia, East Asia and Sub-Saharan Africa, respectively  
110 (Research Institute (IFPRI), 2009). Plants being sessile organisms cannot migrate to circumvent  
111 the stress conditions and need to adapt themselves with adversities like rising temperature (Barah  
112 et al., 2013). Variations in temperature have direct correlation with plant disease by altering host

113 resistance mechanisms of plants towards a particular disease (Peng et al., 2004). Evidence also  
114 suggests that SB disease severity in crops rapidly increases with elevated carbon dioxide levels  
115 (Luck et al., 2011). Hence, it forms a matter of serious concern to devise strategies to improve  
116 the crop varieties to sustain such environmental adversities.

117 In recent years, some studies have tried to delineate the mechanism of rice responses to  
118 the impending pathogen attack at a molecular level. Various signal transduction pathways have  
119 been shown to be involved in rice in response to infection by *R. solani*. These pathways include  
120 Jasmonic acid, Octadecanoid, Ethylene and Salicylic Acid (SA) and Calcium/ Calmodulin  
121 pathways. Studies show that Jasmonic acid (JA), Lipoxygenase (LOX) and Octadecanoid  
122 pathways are induced upon *R. solani* infection (Taheri et al., 2010). Mutant rice deficient in JA  
123 responses showed enhanced susceptibility to SB pathogen indicating that JA pathway plays a  
124 crucial role in rice resistance to *R. solani*. LOX is a precursor for the JA pathway and the  
125 corresponding gene is shown to be overexpressed in rice under *R. solani* infected conditions  
126 (Sayari et al., 2014). Substantial evidence also indicated the involvement of ethylene (ET)  
127 pathway in resistance of rice against SB. Rice overexpressing ET biosynthetic genes tend to  
128 increase the expression of PR1b and PR5 genes, which results in resistance (Helliwell et al.,  
129 2013). The induction of PR genes is an indication of *Systemic Acquired Resistance (SAR)*  
130 activation in plants. Further, active involvement of SAR pathway is also suggested by the  
131 enhanced expression of PR-5, PR-3, PR-9, PR12, PR-13 and Phenylalanine Ammonia Lyase  
132 (PAL) genes. PAL is an essential SAR marker (Sayari et al., 2014). Calcium and calmodulin  
133 signaling pathways play crucial roles in rice stress responses. Various genes including OsCam1–  
134 1 belonging to calcium calmodulin signaling pathway showed enhanced expression in *R. solani*  
135 infected rice suggesting its crucial role in defense (Zhang et al., 2017).

136 Systems biology is often defined as a global approach for developing comprehensive  
137 understanding of Plant-Pathogen interactions by establishing relationships between data in the  
138 form of genes, RNA, proteins and metabolites (Mishra et al., 2019). Rapid development and  
139 gradual reduction in cost of next generation sequencing (NGS) technologies paved the way for  
140 methods like RNA-Sequencing to conduct genome scale experiments for studying plant  
141 pathogen interactions. Very few studies using RNA-Seq based approaches have been used to  
142 determine molecular signatures related to *R. solani* infection in different susceptible and resistant  
143 rice varieties (Ghosh et al., 2017; Zhang et al., 2017; Shi et al., 2020). Using microarray analysis,  
144 Venu *et.al* have identified both up-regulated and down-regulated rice genes after SB disease  
145 condition (Venu et al., 2007). Comparative RNA-Seq analysis predicted rice transcriptome  
146 profiles for Lemont (susceptible) and TeQing (Moderately resistant) varieties in SB disease  
147 condition (Zhang et al., 2017). The experiment identified a total of 4806 differentially expressed  
148 genes (DEGs) and suggested photorespiration, photosynthesis and JA pathway to have major  
149 roles in rice resistance mechanism to the disease. Another similar analysis was conducted on two  
150 different varieties of rice- Yanhui-888 (YH), a moderately resistant cultivar and Jingang-30 (JG),  
151 a susceptible cultivar to detect rice responses against *R. solani* infection (Shi et al., 2020). This

152 study identified 3085 and 285 DEGs in JG and YH rice varieties, and showed that EIN2,  
153 WRKY33 genes are important in rice responses to *R. solani*.

154 Karmakar *et.al.* (2019) conducted metabolome-transcriptome studies to identify  
155 metabolome and transcript level alteration in rice infected with *R. solani*. This study identified 38  
156 differentially expressed proteins (DEPs) and 40 metabolites in rice after *R. solani* infection.  
157 Study also suggests carbohydrate metabolism to be a crucial point of focus for rice under  
158 infected conditions (Karmakar et al., 2019). However, the exact molecular crosstalk mechanism  
159 still remains unclear and the search for naturally occurring resistant germplasm continues.

160 To this end, a comparative Time-Series based RNA-Seq analysis of a widely cultivated  
161 rice (BPT-5204) variety during *R. solani* infection was performed. Differentially regulated rice  
162 transcriptome was decoded in 1<sup>st</sup>, 2<sup>nd</sup> and 5<sup>th</sup> day post *R. solani* infection. Our study identifies  
163 key molecular signatures in terms of genes, pathways, biological processes and regulatory hub  
164 genes, which were significantly altered in rice plants after *R. solani* infection and might play a  
165 crucial role in plant defense mechanism. Additionally, Transcriptional Regulatory Networks  
166 provided insights into rewiring patterns of Transcription Factors (TFs) in all the three days after  
167 infection.

168

## 169 **MATERIALS AND METHODS**

170

### 171 **Rice plant growth and inoculation**

172 *Oryza sativa sp. indica* cultivar BPT-5204 (Samba Mahsuri) was used in this study. The  
173 sclerotia of *R. solani* were cultured on Potato Dextrose Agar (39 g/L) medium at 28 °C. Freshly  
174 grown equal-sized sclerotia blocks were placed on the leaf sheaths at the late tillering stage of the  
175 rice plants grown in warm and moist conditions (Prathi et al., 2018). After inoculation, the  
176 infected plants were maintained at 28 °C in dark for one to three days. After 1<sup>st</sup>, 2<sup>nd</sup> and 5<sup>th</sup> day  
177 of treatment, leaf tissue samples were collected as three biological replicates.

178

### 179 **RNA extraction and sequencing**

180 RNA was extracted from 50-100 mg leaf tissue using Qiagen RNAeasy Plant Mini kit,  
181 according to the manufacturer's instructions. Briefly, leaves were homogenized using liquid  
182 nitrogen and RLT buffer in TOMY microsmash homogenizer. The lysate was centrifuged to  
183 remove debris. Supernatant was mixed with equal volume of 70% ethanol and loaded onto  
184 Qiagen RNeasy column and further steps were followed as per manufacturer's guidelines,  
185 including on-column DNase treatment using Qiagen RNase free DNase. RNA was eluted in  
186 Nuclease free water. The quantification, quality and integrity of the RNA was assessed using  
187 Nanodrop2000 (Thermo Scientific, USA), Qubit (Thermo Scientific, USA) and Bioanalyzer  
188 2100 (Agilent, USA), respectively.

189 RNA sequencing libraries were prepared with Illumina-compatible NEBNext® Ultra™ II  
190 Directional RNA Library Prep Kit (New England BioLabs, MA, USA) at Genotypic Technology

191 Pvt. Ltd., Bangalore, India. An aliquot of 500 ng of total RNA was taken for mRNA isolation,  
192 fragmentation and priming. Fragmented and primed mRNA was further subjected to first strand  
193 synthesis followed by second strand synthesis. The double stranded cDNA was purified using  
194 JetSeq Beads (Bioline, USA). Purified cDNA was end-repaired, adenylated and ligated to  
195 Illumina multiplex barcode adapters as per NEBNext® Ultra™ II Directional RNA Library Prep  
196 protocol followed by second strand excision using USER enzyme at 37 °C for 15mins. Illumina  
197 Universal Adapters were used in the study. Adapter ligated cDNA was purified using Jet Seq  
198 Beads and was subjected to 11 cycles of Indexing-PCR (98 °C for 30 sec, cycling (98 °C for  
199 10sec, 65 °C for 75 sec) and 65 °C for 5 min) to enrich the adapter-ligated fragments. Final PCR  
200 product (sequencing library) was purified with Jet Seq Beads, followed by library quality control  
201 check. Illumina-compatible sequencing library was quantified by Qubit fluorometer (Thermo  
202 Fisher Scientific, MA, USA) and its fragment size distribution was analysed on Agilent 2100  
203 Bioanalyzer. The libraries were pooled in equimolar quantities and sequenced on Illumina HiSeq  
204 X10 sequencer (Illumina, San Diego, USA) using 150 bp paired-end chemistry and HiSeq X10  
205 SBS reagents. An average of 13.9±3.44 million reads were obtained for the samples.

206

### 207 **Quality check and trimming of reads**

208 All reads were analyzed using robust and benchmarked in-house RNA-Seq pipeline  
209 (<https://github.com/evolomics-group/rna-seq-pipeline>). The pipeline being modular can be used  
210 in both plant and human model systems (Sahu et al., 2020; Sahu et al., 2020; Roy et al., 2020).  
211 Firstly, quality check for the raw fastq files was conducted using fastQC tool. Following criteria  
212 were considered to filter out the low-quality reads: reads lower than Q30 phred score; reads  
213 shorter than 15 bp; Illumina adapter clipping were discarded. These clean reads were then re-  
214 assessed for quality prior to alignment.

215

### 216 **Mapping and quantification of reads against the rice genome**

217 Clean reads were mapped to rice reference genome Os-Nipponbare-Reference-IRGSP-  
218 1.0 from RAP-DB database (Sakai et al., 2013). Prior to mapping, indexing of the reference  
219 genome was done using the HISAT2 indexing scheme, which uses the Burrows-Wheeler  
220 transform and the Ferragina-Manzini (FM) as indexing parameters (Kim et al., 2015). Further,  
221 these clean reads were mapped against the reference index file using HISAT2. Samtools was  
222 used to convert the mapped output files (sam files) into binary files (bam files) (Li et al., 2009).  
223 The mapped binary files were quantified using the Subread package called featureCounts and  
224 counted at the feature (gene) level for further analysis (Liao et al., 2014).

225

### 226 **Normalization and visualization of count data**

227 The R/Bioconductor package DESeq2 was implemented to perform the statistical  
228 analysis on count data (Love et al., 2014). Generalized linear model (GLM) and Wald test were  
229 used to evaluate the significance of differentially expressed genes (DEGs). Counts below a  
230 threshold of 10 were rejected. Benjamini-Hochberg multiple testing adjustment procedure was



231 implemented to adjust the P Values. The rank score of DEGs was determined using lfcShrink  
232 function. Data transformation was done using variance stabilizing transformation. The amount of  
233 shrinkage was estimated using dispersion parameters for each gene. Principal component  
234 analysis was used to evaluate the overall effect of experimental covariates. Genes showing a  
235 significance of Padj value  $\leq 0.05$  were considered and termed as differentially expressed genes  
236 (DEGs).

237

### 238 **GO and pathway enrichment analysis**

239 Gene Ontology (GO) annotations for all the day specific DEGs were performed using  
240 CARMO (Wang et al., 2015b). DEGs were classified according to their Biological Process (BP),  
241 Molecular Function (MF) and Cellular Component (CC) categories they are involved in. Only  
242 significant GO terms were ranked taking enrichment P Value ( $< 0.05$ ) as cutoff. All data  
243 visualization and plotting were carried out in RStudio work environment. To check alterations  
244 occurring at the pathway level, the unique DEGs were also mapped against the Kyoto  
245 Encyclopedia of Genes and Genomes (KEGG) using open source and upgraded tool KOBAS 2.0  
246 (Xie et al., 2011). Significant pathway terms were ranked taking enrichment P Value ( $< 0.05$ ) as  
247 cutoff. Top 20 enriched KEGG pathways for all the three days were visualized as dot plots using  
248 ‘ggplot2’ package in RStudio.

249

### 250 **Transcription Factor identification and TF-TG network construction**

251 Transcription Factors were extracted from the DEGs by intersecting the same with a list  
252 of 1862 TFs RAP id entries collected from PlantTFDB (Guo et al., 2007) database. TFs  
253 expressed as common in all the three days were identified and further visualized as heatmaps  
254 using the MeV tool. For construction of the Transcription Factor – Target Gene (TF-TG)  
255 networks, the upstream sequences of the day specific DEGs were initially extracted using RSAT  
256 (Thomas-Chollier et al., 2008). The region selected was between -1 kb and -1 of the TSS  
257 (transcription start site). PWMs for all the TFs were downloaded from the Cis-BP database  
258 (Weirauch et al., 2014). The downloaded PWMs were used to scan the upstream sequences of  
259 DEGs in FASTA format establishing relations between each TF and TG. The whole process was  
260 conducted using the FIMO of MEME suite under a High Performance Computing (HPC)  
261 environment with slurm acting as a queue manager for a streamlined workflow (Grant et al.,  
262 2011). Finally, TF-TG relations were visualized as networks using Cytoscape 3.8.1 (Su et al.,  
263 2014) for each day separately.

264

### 265 **PR genes study and benchmarking**

266 A comprehensive and non-redundant list of 48 putative rice Resistant Genes (RGs) found  
267 in three major diseases of rice i.e., Bacterial Blight (BB), Rice Blast (RB) and Sheath Blight (SB)  
268 was prepared by integrating data collected from PRGdb 3.0 database (Osuna-Cruz et al., 2018)  
269 (for BB and RB disease) and manual curation of literature to find genes conferring resistance

270 against SB (Supplemental Data Set 6). DEGs were compared with this list to check for the  
271 presence of RGs in our data and visualized using RStudio.

272

273

274

## 275 **RESULTS**

276

### 277 **Transcriptome reprogramming of rice plants in response to *R. solani* infection**

278 In the present study, we used a Time-Series RNA-Seq approach to decipher the  
279 differential regulation in the rice transcriptome profile upon *R. solani* infection. Rice cultivar  
280 BPT- 5402 was inoculated with *R. solani* and samples were harvested at 1<sup>st</sup>, 2<sup>nd</sup> and 5<sup>th</sup> day post  
281 inoculation with the pathogen. A total of 428 (292 up-regulated, 136 down-regulated), 3225  
282 (2102 up-regulated, 1123 down-regulated) and 1225 (739 up-regulated, 486 down-regulated)  
283 unique DEGs were identified in day 1, 2 and 5 samples, respectively in rice in response to *R.*  
284 *solani* (Fig. 1A) (Supplemental Data Set 1). Maximum number of rice genes were expressed in  
285 samples of day 2 infection followed by day 5 and day 1. Moreover, the number of up-regulated  
286 DEGs outnumbered the down-regulated DEGs at each of the Time Points. We further created  
287 two unified lists of the DEGs (combining all the 3 Time Points) into groups of up-regulated and  
288 down-regulated genes. A total of 2,456 and 1,515 DEGs were found to be only up-regulated and  
289 down-regulated respectively. In the list of 2,456 up-regulated DEGs, 133 were differentially  
290 expressed at all the three Time Points (Fig. 1B) whereas 20 of the 1,515 total down-regulated  
291 DEGs were differentially expressed at all the three Time Points (Fig. 1C).

292

### 293 **Differential signatures of Biological Processes in Rice during *R. solani* infection**

294 To elucidate the various biologically significant functions associated with the specific  
295 DEGs of day 1, 2 and 5 samples in rice after *R. solani* infection, we performed GO enrichment  
296 analysis using CARMO (Wang et al., 2015b). We had divided the DEGs into down-regulated  
297 and up-regulated lists for each of the Time Points and used them for GSEA (Gene Set  
298 Enrichment Analysis). Considering enrichment P Value threshold 0.05, we identified 38, 119 and  
299 32 up-regulated and 23, 117 and 43 down-regulated GO terms belonging to Biological process  
300 (BP), Cellular Component (CC) and Molecular Function (MF) categories in day 1, 2 and 5  
301 samples, respectively (Supplemental Data Set 2). Out of these enriched GO terms, we selected  
302 the top 20 enriched Biological Processes of day 1, 2 and 5 samples (up-regulated and/or down-  
303 regulated) for further analysis. The summary of the GSEA has been presented in Figure 2.

304 To determine the highly significant Biological Processes associated with rice responses to  
305 *R. solani*, a comparison was carried out among the top 20 enriched BPs of all the three Time  
306 Points. The GO BP terms associated with response to biotic stimulus (GO:0009607), response to  
307 cadmium ion (GO:0046686), response to stress (GO:0006950), response to abiotic stimulus  
308 (GO:0009628) and biosynthetic process (GO:0009058) were found to be expressed as common  
309 among all the three Time Points. Interestingly, the BPs ‘response to biotic stimulus’, ‘response to



310 cadmium ion' and 'response to stress' were found to be only up-regulated at all the three Time  
311 Points. A step further, the genes belonging to each of the above-mentioned common BPs and  
312 differentially expressed at all the three Time Points have been listed in Supplemental Table 1. In  
313 summary, as the genes listed in Supplemental Table 1 belonging to common BPs were  
314 differentially expressed at all the three Time Points and were either up-regulated or down-  
315 regulated throughout the Time Points, they can be considered as potential *R. solani* responsive  
316 genes.

317

### 318 **Differential Pathway Enrichment analysis**

319 In order to characterize the significant pathways that are differentially regulated in rice  
320 after *R. solani* infection, we performed pathway enrichment analysis from KEGG database using  
321 KOBAS (Xie et al., 2011). The KEGG pathway entries that were altered in rice after infection in  
322 day 1, 2 and 5 samples, respectively have been listed in Supplemental Data Set 3. Of them, the  
323 top 20 altered KEGG pathways (both up-regulated and down-regulated with enriched P Value  
324 threshold 0.05) enriched at all the three Time Points are represented as dot plots in Figure 3. An  
325 easy comparison of the top 20 significant KEGG pathways among the three Time Points was  
326 drawn (Supplemental Data Set 4). The pathway 'Ribosome biogenesis in eukaryotes' was found  
327 to be common and up-regulated in all the three samples, whereas 'Metabolic pathways' and  
328 'Biosynthesis of secondary metabolites' appeared more as down-regulated in all the three  
329 samples. The gene 'CYP51H4/ Os02g0323600' (a Cytochrome P450-like protein) is a member  
330 of both the 'Metabolic pathways' and 'Biosynthesis of secondary metabolites' pathways and was  
331 found to be common for all the three samples.

332 It was observed that 1<sup>st</sup> and 2<sup>nd</sup> day samples had more pathways in common as compared  
333 to 1<sup>st</sup> and 5<sup>th</sup> day. To gain deeper insights into gene level involvement, we checked the common  
334 genes within these overlapping (up-regulated and down-regulated) pathways appearing in day 1  
335 and day 2 samples. Genes Os02g0218700/ AOS3, Os03g0179900/ LOX2 and Os08g0509100/  
336 LOX8 belonging to 'α-Linolenic acid metabolism' and 'Linoleic acid metabolism' were found to  
337 be up-regulated and expressed commonly in day 1 and day 2 samples.

338 The pathway terms 'Carbon fixation in photosynthetic organisms', 'Carbon metabolism',  
339 'Glyoxylate and dicarboxylate metabolism', 'Photosynthesis' and 'Photosynthesis - antenna  
340 proteins' were found to be down-regulated and expressed commonly in day 1 and day 2 samples  
341 suggesting compromised carbon fixation and photosynthesis in rice under *R. solani* infection  
342 conditions. Five of the genes belonging to the 'Carbon fixation in photosynthetic organisms',  
343 'Carbon metabolism' and 'Glyoxylate and dicarboxylate metabolism' pathways i.e.,  
344 Os12g0207600, Os01g0791033, Os05g0427800, Os10g0356000 and Os05g0496200 were found  
345 to be differentially expressed at both the Time Points i.e., day 1 and day 2. Among the five  
346 genes, Os05g0496200 codes for 3-phosphoglycerate kinase and the rest for the RuBisCO large  
347 subunit.

348 Pathways such as 'MAPK signaling pathway', 'Phenylpropanoid biosynthesis' and  
349 'Phenylalanine metabolism' are also significant as their roles in rice in response to *R. solani* have

350 been previously well documented (Karmakar et al., 2019; Ghosh et al., 2017; Zhang et al., 2017).  
351 Our results are in line with previous studies that also suggested their alteration in rice after *R.*  
352 *solani* infection. The pathways ‘Phenylalanine metabolism ’and ‘Phenylpropanoid biosynthesis  
353 mostly consist of Peroxidases and PAL genes.

354

### 355 **Transcription Factors and families induced in rice in response to *R. solani* infection**

356 Transcription Factors play crucial roles as either activators or repressors of genes in  
357 specific ways and are involved in a wide range of biological processes including plant defense  
358 against stressors (Smaczniak et al., 2012). TFs of rice spanned across 63 families of which TFs  
359 belonging to 39 families were found to be expressed in the present study. A total of 24 (13 up-  
360 regulated and 11 down-regulated), 212 (149 up-regulated and 63 down-regulated) and 76 (33 up-  
361 regulated and 43 down-regulated) TFs were found to be differentially expressed at 1<sup>st</sup>, 2<sup>nd</sup> and 5<sup>th</sup>  
362 dpi, respectively (Fig. 4A) (Supplemental Data Set 5). Of the 39 expressed TF families, 7 TF  
363 families showed significant change in expression after *R. solani* infection (Supplemental Table  
364 2). It was observed that for each of the 7 TF families, the number of up-regulated TFs  
365 outnumbered the number of down-regulated TFs except for MYB-related family TFs expressed  
366 on day 5, where an opposite trend was observed.

367 Further, we checked the TFs differentially expressed as common to all the three Time  
368 Points (Figure 4B). There were a total seven of them i.e., MYB30, SUB1B, MSL13, BBX28,  
369 GRAS46, TCL2 and CCA1 and all of them maintained uniform expression patterns with  
370 increasing Time Points suggesting their crucial role in rice responses to *R. solani* infection. Of  
371 the seven commonly expressed TFs, five were up-regulated and only CCA1, TCL2 were found  
372 to be down-regulated at all the Time Points (Fig. 4C).

373

### 374 **Topological rewiring of Transcriptional Regulatory Networks in rice during *R. solani*** 375 **infection and identification of regulatory hubs**

376 Biological network studies help in delineating how cells respond to a particular  
377 environmental condition like stress. In order to gain a systems level insight into the molecular  
378 mechanism in the rice plant post infection, we have constructed TF-TG regulatory networks for  
379 all the three Time Points using a machine learning approach (Fig. 5). Here, the Target Gene (TG)  
380 represents genes and TF represents Transcription Factors differentially expressed in each Time  
381 Point.

382 There was a high variance among the sizes of the networks (Supplemental Table 3). Out  
383 of the three networks, the TF-TG network of day 2 was the largest in terms of number of edges  
384 and nodes. On analysing the topological parameters, it was found that the degree distribution of  
385 the networks did not follow a Poisson distribution. Hence, the constructed networks were not  
386 random in nature. A power-law was fit into each degree distribution and a goodness-of-fit test  
387 was calculated. The test was performed by a bootstrapping procedure of 1000 simulations. The  
388 result showed that only the degree distribution of the TF-TG network of day 2 could be

389 explained by a power-law. In addition to being scale-free, the network is negatively assortative.  
390 This makes the network more robust than the other day 1 and day 5 networks.

391 Taking into consideration the parameter of ‘degree of centrality’, we identified 10 most  
392 highly connected TFs and marked them as regulatory hubs for each Time Point as shown in  
393 Supplemental Table 3. A dense TF regulatory network was obtained for day 2 with 2937 nodes  
394 and 163841 edges. Three of the TFs (marked with \* in Supplemental Table 3) i.e.  
395 Os09g0287000/ SUB1B, Os02g0624300/ MYB30 and Os08g0157600/ CCA1 identified as  
396 regulatory hubs from the TF-TG network were also expressed as common to all the three  
397 samples (Fig. 4C). SUB1B and MYB30 showed consistency in maintaining higher expression  
398 levels whereas CCA1 was down-regulated throughout all the three Time Points.

### 399 **Putative Resistant Genes in Rice against *R. solani* and benchmarking**

400 In order to benchmark and elucidate the role of putative *R. solani* resistant genes, our  
401 dataset was compared to a comprehensive and non-redundant list of 48 putative rice Resistant  
402 Genes (RGs) found in the three major diseases of rice i.e., Bacterial Blight (BB), Rice Blast (RB)  
403 and Sheath Blight (SB) disease. The non-redundant list was prepared by integrating data  
404 collected from PRGdb 3.0 database (Osuna-Cruz et al., 2018) (for BB and RB disease) and  
405 manual curation of literatures to find genes conferring resistance against SB owing to non-  
406 availability of any dedicated repository for SB RGs (Supplemental Data Set 6). Out of the genes,  
407 ten of the DEGs from this study matched with public data and were termed as Putative Resistant  
408 genes (Supplemental Figure S1). Out of them, 9 genes i.e., PR4, Os11g0569500/ XA21 (59.6%  
409 similar), Os11g0569300/XA21 (59.6% similar), 2H16, PGIP1, ACS2, OXO4, RCH10, PIT,  
410 *chi11* were found to be up-regulated excluding 2H16. Additionally, majority of these Putative  
411 Resistant genes found their expression only on day 2 suggesting rice defense response to be  
412 stronger at this Time Point.

## 413 **DISCUSSION**

414

### 415 **Transcriptional response of rice to *R. solani***

416 Transcriptome studies using RNA-Seq or microarray provide systems level insights into  
417 key genes, pathways and differentially regulated processes in a specific condition. The present  
418 study used a Time-Series RNA-Seq analysis to decipher the transcriptome responses of rice  
419 plants upon *R. solani* infection. We have identified 428, 3225 and 1225 DEGs in day 1 ,2 and 5  
420 samples, respectively. At every Time Point, the number of up-regulated genes always  
421 outnumbered the down-regulated genes. Day 2 sample showed the largest number of DEGs,  
422 which indicated that defense response of rice plants to *R. solani* was at the peak on 2nd dpi.  
423 Furthermore, identification of the genes belonging to the common biological processes that were  
424 expressed differentially at all the three Time Points (Supplemental Table 1) presents new

425 avenues to identify SB tolerant genes in rice plants. Some of such processes have been described  
426 here under.

427

### 428 **JA biosynthesis and MAPK signaling pathways are key role players in rice plants during *R.*** 429 ***solani* infection**

430 Jasmonic acid signaling plays a central role in responses to necrotrophic pathogens by  
431 activating a plethora of pathogenesis-related (PR) genes (Tamaoki et al., 2013). Our study  
432 showed the induction of JA signaling in rice during *R. solani* infection. For example, the genes  
433 Os02g0218700/ AOS3, Os03g0179900/ LOX2 and Os08g0509100/ LOX8 belonging to ‘ $\alpha$ -  
434 Linolenic acid metabolism’ and ‘Linoleic acid metabolism’ were found to be up-regulated and  
435 expressed on day 1 and day 2. Allene Oxide Synthase- AOS3 has already been identified as a  
436 candidate hub gene in Lemont rice variety responding to *R. solani* (Zhang et al., 2018). A recent  
437 study also showed that the expression levels of LOX- lipoxygenase were higher in SB resistant  
438 rice as compared to susceptible ones (Sayari et al., 2014). The genes AOS3, LOX2 and LOX8  
439 are key participants in JA biogenesis and our results indicate that JA signaling pathway is  
440 activated in rice upon *R. solani* infection.

441 ‘MAPK signaling pathway’ is also an important signaling pathway in rice plants in  
442 initiating defense responses to *R. solani* infection. We have identified 30 MAPK signaling  
443 pathway related genes that were up-regulated after *R. solani* infection (Fig. 3B and Supplemental  
444 Data Set 3). Mitogen-activated protein kinases (MAPK) are small molecules that take part in  
445 downstream signaling of receptors triggered by external stimulus like Pathogen/ Microbe-  
446 Associated Molecular Patterns (PAMPs/ MAMPs) and pathogenic effectors leading to the  
447 activation of numerous defense response mechanisms like biosynthesis of defense related  
448 hormones, ROS generation, stomatal closure, induction of PR genes and Hypersensitive  
449 Response (HR) leading to cell death (Meng and Zhang., 2013). About 75 putative MAPK are  
450 activated in rice upon different stress conditions (Rao et al., 2010; Kumar et al., 2008). A recent  
451 study also showed that MAPK6 was highly expressed in transgenic rice plant during SB disease  
452 condition (Karmakar et al., 2019).

453

### 454 **Alteration of CYPs, Peroxidases and PAL after *R. solani* infection**

455 Cytochrome P450s (CYPs) are oxidoreductase enzymes that play important roles in  
456 biosynthesis of secondary metabolites, antioxidants, plant hormones etc. Additionally, they are  
457 also involved in plant defense responses (Pandian et al., 2020). An earlier study showed the role  
458 of CYP78, a plant specific CYP450 in imparting resistance to *R. solani* challenged rice plants by  
459 the overexpression of CYP78A encoding BSR2 (Broad Spectrum Resistance) gene (Maeda et al.,  
460 2019). In the present study, the gene ‘CYP51H4/ Os02g0323600’ a member of both the  
461 ‘Metabolic pathways’ and ‘Biosynthesis of secondary metabolites’ pathways was found to be  
462 strongly downregulated at all the Time Points post infection.

463 The secondary metabolic pathways ‘Phenylpropanoid biosynthesis’ and ‘Phenylalanine  
464 metabolism’ (Fig. 3B) were found to be up-regulated upon *R. solani* infection in early infection

465 stage. Most of the genes in the pathways of ‘Phenylalanine metabolism ’and ‘Phenylpropanoid  
466 biosynthesis include Peroxidases and PAL. Previous studies suggest that Peroxidase and PAL  
467 genes were activated upon *R. solani* infection in rice, with PAL acting as a constituent of multi-  
468 component coordinated defense response mechanism against the pathogen (Bera et al. 1999),  
469 (Mutuku et al., 2012). Phenylpropanoid biosynthesis is known to be involved in the formation of  
470 secondary metabolites like phytoalexin, lignin and phenolic substances. Both Phenylpropanoid  
471 and PAL genes were activated in TeQing a moderately resistant rice cultivator upon *R. solani*  
472 infection (Zhang et al., 2017). Induction of Peroxidases and PAL genes might constitute a  
473 protection strategy initiated by rice to reinforce its cell wall cross linking thereby preventing  
474 further invasion by fungal hyphae. These results suggest that Peroxidases and PAL metabolism  
475 have significant role in early infection stage in the present case.

476

#### 477 **Photosynthesis machinery is down-regulated after *R. solani* infection**

478 Plants tend to compromise their primary processes such as photosynthesis and  
479 reproduction upon exposure to stressed conditions in order to allocate more resources to activate  
480 defense, stress and secondary metabolic processes (Barah et al., 2015). For example, five of the  
481 genes belonging to the ‘Carbon fixation in photosynthetic organisms’, ‘Carbon metabolism’ and  
482 ‘Glyoxylate and dicarboxylate metabolism’ pathways i.e., Os12g0207600, Os01g0791033,  
483 Os05g0427800, Os10g0356000 and Os05g0496200 were found to be commonly down-regulated  
484 at day 1 and day 2 Time Points. Out of these five genes, Os05g0496200 codes for 3-  
485 phosphoglycerate kinase and the rest code for the RuBisCO large subunit. RuBisCO is the  
486 primary enzyme for carbon fixation in plants. Previous studies have shown that rice,  
487 *Arabidopsis*, tomato and soyabean showed decreased RuBisCO amount and function upon  
488 exposure to drought stress (Majumdar et al., 1991). For the pathway ‘Photosynthesis’, the gene  
489 Os01g0938100 encoding Psb28 was found to be common to both day 1 and day 2 samples.  
490 Psb28 is a constituent of photosystem II and it has been shown that the disruption of psb28 gene  
491 in rice encourages pale green type morphology in rice (Jung et al., 2008). Recently, GC-MS  
492 analysis of *R. solani* susceptible rice cultivar, Pusa Basmati-1 (PB1) found deformed chloroplast  
493 ultrastructure and reduced photosynthetic efficiency after infection (Ghosh et al., 2017). Our  
494 study results also strongly suggested that Photosynthesis machinery was compromised upon *R.*  
495 *solani* infection.

496

#### 497 **WRKY, NAC, ERF and MYB family Transcription Factors are induced after *R. solani*** 498 **infection**

499 Our analysis identified that the expression patterns of WRKY, NAC, ERF and MYB TFs  
500 were significantly altered in rice plants in response to the treatment with *R. solani*. WRKY TFs  
501 are considered as central elements for rice resistance to various pathogens (Khong et al., 2008).  
502 In the recent past, WRKY TF genes have also been shown to be the key role players in rice  
503 defenses against *R. solani*. To our knowledge, so far WRKY4, WRKY13, WRKY80 and  
504 WRKY30 have been identified to impart resistance in rice to *R. solani* infection (Wang et al.,



505 2015a; Lilly et al., 2019; Peng et al., 2016; Peng et al., 2012). Out of the 27 WRKY TFs  
506 identified to be expressed in our study, 26 were up-regulated at day 2 and day 5 Time Points  
507 (Supplemental Table 2). A recent study also suggested that the expression of WRKY30 gene  
508 enhances endogenous JA accumulation in transgenic rice thereby imparting resistance to SB  
509 disease (Peng et al., 2012). As the JA biosynthetic genes i.e., AOS3, LOX2 and LOX8 were also  
510 found to be up-regulated in our analysis, it can be speculated that the overexpression of WRKY  
511 TFs might have led to enhanced JA synthesis in rice after *R. solani* infection. Various TFs  
512 belonging to NAC, MYB and ERF TF families were more up-regulated after *R. solani* infection  
513 (Supplemental Table 2). In line with these observations, another recent study also suggested the  
514 involvement of MYB and NAC TFs in rice SB responses (Peng Yuan et al., 2020). To  
515 summarize, WRKY, NAC, ERF and MYB TFs are highly induced in rice upon *R. solani*  
516 infection.

517

### 518 **Transcriptional Regulatory Network identifies SUB1B, MYB30 and CCA1 as key response** 519 **signatures**

520 Most TFs bind to recognition sites called *cis*-regulatory elements in the promoter regions  
521 of target genes (TGs) leading to subsequent activation or deactivation of the corresponding gene.  
522 Differential re-wiring of the TF- TG associations provide a genome- scale overview of the  
523 transcriptional re-programming (Lim and Xie, 2018). The topology of the transcriptional  
524 regulatory networks can be used for identifying hub genes. The key hub Transcription Factors  
525 identified from our analysis were SUB1B, MYB30 and CCA1. These three hub TFs constitute  
526 rice core responses to *R. solani* infection. All of them showed uniform expression during all  
527 three Time Points. SUB1A is an ERF family TF responsible for both drought and submergence  
528 tolerance in rice by repressing the Gibberellic Acid response pathway through the up-regulation  
529 of DREB1s and AP59. It also regulates ROS production to prevent chlorophyll and oxidative  
530 damage during re-oxygenation (Fukao et al. 2010). SUB1B is an allele of SUB1A and might  
531 have a similar role in regulating ROS production in the cell. SUB1B might also be involved in  
532 defense against *R. solani* apart from flood tolerance.

533 MYB30 TF is a microbe-associated molecular pattern (MAMP) responsive TF, which  
534 enhances resistance in rice against bacterial and fungal pathogens by producing more  
535 hydroxycinnamic acids (HCAAs) (Kishi-Kaboshi et al., 2018). HCAAs are phenylpropanoids  
536 made from phenylalanine. They bind to components of the cell wall and facilitate cell wall cross-  
537 linking (de Oliveira et al., 2015). From our pathway enrichment analysis, it is evident that  
538 ‘Phenylalanine metabolism’ and ‘Phenylpropanoid biosynthesis’ pathways are crucial parts of  
539 rice responses to *R. solani*. Therefore, MYB TF family members like MYB30 may be involved  
540 in the production of more HCAAs. MYB30 is also a negative regulator of cold tolerance in rice  
541 by suppressing  $\beta$ -amylase activity and hence, reducing Maltose production that is responsible for  
542 cell membrane protection against cold stress (Lv et al., 2017).

543 Circadian Clock Associated 1 (CCA1) is a component of Morning Element Loop of  
544 circadian cycle and reaches its peak during dawn. Circadian Clock Associated 1 (CCA1) and



545 Timing of Cab Expression 1 (TOC1) are known as central circadian clock oscillators. Circadian  
546 clock system has been shown to regulate ROS homeostasis, Abscisic Acid stress response  
547 signaling and various R genes, and their targets in plants in response to various stressors. The  
548 cycle initiates in the presence of light the activation of CCA1 and gradually ceases by the  
549 evening due to higher TOC1 gene expression. As the cycle progresses from morning to evening,  
550 CCA1 decreases and TOC1 increases with its peak at dusk (Bhattacharya et al., 2017). In the  
551 present study, CCA1 identified as a hub TF was down-regulated and in contrast, its partner  
552 TOC1 was highly up-regulated at all the three-day Time Points suggesting the strong influence  
553 of *R. solani* on circadian cycle of the rice plant. Recently, it was shown that TOC1 and Abscisic  
554 Acid work together in a feedback loop and is important for plant response to drought stress  
555 condition (Legnaioli et al., 2009).

556

### 557 **SB resistance genes in rice**

558 A list of 10 putative resistant genes were found to be expressed in our data, and seven of  
559 them belonged to SB resistance gene list. The gene Os11g0592200/ PR-4b belongs to the class II  
560 of the PR-4 family and is located in the vacuole. It has also been shown that rice PR-4b exhibits  
561 antifungal activity against *R. solani*, but the resistance mechanism underlying the antifungal  
562 activity is yet to be revealed (Zhu et al., 2006). Os11g0569500 and Os11g0569300 are *Xa21*  
563 homologues and share 59.6% similarity with *Xa21*. *Xa21* has always been a popular target for  
564 researchers studying rice resistance to Bacterial Blight. *Xa21* imparts broad spectrum resistance  
565 against Bacterial Blight disease by altering various energy distribution schemas and targeting  
566 phytohormones (Peng et al., 2015). The present study also suggests that *Xa21*, already known for  
567 BB resistance might also be important for rice resistance against SB disease. Recently,  
568 transgenic rice lines overexpressing 2H16 exhibited enhanced tolerance to SB disease (Li et al.,  
569 2013). In our study, Os06g0316000/ 2H16 was the only down-regulated SB resistant gene. The  
570 gene Os05g0104200/ PGIP1 has been reported to counter-attack polygalacturonases (PG)  
571 secreted by the fungal pathogens to degrade plant cell wall and rice overexpressing PGIP1  
572 showed significant resistance to *R. solani* (Wang et al., 2015).

573 Ethylene biogenesis signaling pathway has been identified to confer resistance to various  
574 diseases along with the modulation of JA and SA pathways. Os04g0578000/ ACS2 1-  
575 aminocyclopropane-1-carboxylic acid synthase is a key gene in Ethylene biogenesis and its  
576 overexpression in transgenic rice lines imparted resistance to SB disease (Helliwell et al., 2013).  
577 The transgenic lines developed with Os03g0694000/ OXO4 and Os06g0726100/ chi11 combined  
578 cassettes exhibited significant resistance to SB disease. OXO4 imparts resistance by activating  
579 SAR by nullifying OA (Oxalic Acid) produced by *R. solani* leading to generation of hydrogen  
580 peroxide (Karmakar et al., 2016). Another transgenic rice line study using combined RCH10 and  
581 AGLU1 showed that their proteins were localized in chloroplast and combined expression of  
582 these two genes enhanced resistance to SB disease in rice (Mao et al., 2014). Os01g0149500 is a  
583 Pit gene homologue with 99.6% similarity with Pit. Pit gene is one of the resistance genes cloned  
584 and identified among 102 RGs against rice blast disease (Xiao et al., 2017). Our dataset contains

585 7 genes viz. PR4, 2H16, PGIP1, ACS2, OXO4, RCH10, chi11, which were reported to confer  
586 resistance to rice in SB disease condition.

## 587 **CONCLUSION**

588 Using systems biology approaches, the study identified key molecular signatures that are  
589 altered in rice plant after *R. solani* infection at three Time Points. Our results have shown that  
590 rice plant differentially modulates its transcriptome landscape in response to *R. solani* attack and  
591 the response strategies during early and late infection phases share both common and unique  
592 signatures. Induction of defense related signaling pathways and several key molecules suggest  
593 activation of strong immune responses in rice upon *R. solani* infection and such redistribution of  
594 energies led to the down-regulation of photosynthesis machinery. *R. solani* infection caused  
595 differential re-wiring of transcriptional regulatory connections in rice and the connectivity  
596 patterns drastically varied as the infection progressed. The study also detected the differential  
597 expression of seven *R. solani* resistant genes. Further research is required to identify whether the  
598 genes identified to be strongly influenced by *R. solani* infection also impart tolerance against SB  
599 disease in rice. The knowledge gained from this study will help develop a better understanding of  
600 the disease and serve as a valuable resource for development of future SB tolerant rice varieties.

601

## 602 **Accession Numbers**

603 Datasets generated from this study has been deposited in NCBI-SRA database with BioProject  
604 accession number PRJNA725619.

605

## 606 **Figure legends**

607 **Figure 1.** Differentially expressed genes (DEGs) in rice after *R. solani* infection. A, Bar plot  
608 showing the number of DEGs (up-regulated and down-regulated) identified in rice at 1<sup>st</sup>, 2<sup>nd</sup> and  
609 5<sup>th</sup> day Time Points after *R. solani* infection. B, Venn diagram showing up-regulated DEGs  
610 expressed as common in day 1, 2 and 5 samples. A total of 133 genes were found to be up-  
611 regulated as common in all the three Time Points. C, Venn diagram showing down-regulated  
612 DEGs expressed as common in day 1, 2 and 5. A total of 20 genes were found to be down-  
613 regulated as common in all the three Time Points.

614

615 **Figure 2.** Gene Ontology (GO) analysis of significantly altered Biological Processes. Bar graphs  
616 showing the differential regulation of various Biological Processes and their expression type

617 (UP= up-regulated and/or DO= down-regulated) in rice after *R. solani* infection at all the three  
618 Time Points i.e., day 1 (A), day2 (B)and day 5 (C).

619

620 **Figure 3.** Pathway enrichment analysis. Dot plot showing top 20 significant regulatory pathways  
621 in rice response to *R. solani* infection at three Time Points i.e., day 1 (A), day 2 (B) and day 5  
622 (C). Here, the size, shape and color represent the number of genes belonging to a particular  
623 pathway, pathway expression type (triangle represents up-regulation and circle represents down-  
624 regulation) and significance level respectively. Rich factor is the ratio of the number of genes in  
625 our DEG list annotated in a particular pathway to the total number of genes present in that  
626 pathway.

627

628 **Figure 4.** Rice Transcription Factors (TFs) responsive to *R. solani*. A, Bar graph showing the  
629 number of TFs differentially expressed in rice at 1, 2 and 5<sup>th</sup> day Time Points after *R. solani*  
630 infection. B, Venn Diagram showing 7 TFs that were commonly expressed in all the three Time  
631 Points. C, Heatmap showing the expression profile of the 7 TFs that were found to be commonly  
632 expressed at all the three Time Points.

633

634 **Figure 5.** Topology of the Transcriptional Regulatory Networks (TRNs) in rice during *R. solani*  
635 infection. Transcription Factor – Target Gene (TF-TG) network of day 1 (A), day 2 (B) and day  
636 5 (C) samples of rice after *R. solani* infection generated using motif scanning method. Here, the  
637 Target Gene (TG) represents genes and TF represents Transcription Factors differentially  
638 expressed in each of the Time Points.

639

## 640 **Supplemental Data**

641 The following supplemental information is available.

642 **Supplemental Figure S1.** Expression profile of resistant genes in rice against Sheath Blight  
643 (SB), Rice Blast (RB) and Bacterial Blight (BB) diseases in our dataset.

644 **Supplemental Table 1.** Common genes of Biological Processes that were expressed at 1<sup>st</sup>, 2<sup>nd</sup>  
645 and 5<sup>th</sup> day Time Point of *R. solani* infection.

646 **Supplemental Table 2.** Altered expression of rice TF families at 1<sup>st</sup>, 2<sup>nd</sup> and 5<sup>th</sup> day Time Point  
647 of *R. solani* infection.

648 **Supplemental Table 3.** Hub Transcription Factors identified from Transcriptional Regulatory  
649 Networks (TRNs) at 1<sup>st</sup>, 2<sup>nd</sup> and 5<sup>th</sup> day Time Point of *R. solani* infection.

650 **Supplemental Data Set 1.** List of differentially expressed genes (DEGs) in rice plant at 1<sup>st</sup>, 2<sup>nd</sup>  
651 and 5<sup>th</sup> day of *R. solani* infection.

652 **Supplemental Data Set 2.** Altered Biological Process (BP), Cellular Component (CC) and  
653 Molecular Function (MF) terms in rice plant at 1<sup>st</sup>, 2<sup>nd</sup> and 5<sup>th</sup> day of *R. solani* infection.

654 **Supplemental Data Set 3.** Altered KEGG pathways in rice plant at 1<sup>st</sup>, 2<sup>nd</sup> and 5<sup>th</sup> day of *R.*  
655 *solani* infection.

656 **Supplemental Data Set 4.** Comparison of differentially regulated pathways in rice plant at 1<sup>st</sup>,  
657 2<sup>nd</sup> and 5<sup>th</sup> day of *R. solani* infection.

658 **Supplemental Data Set 5.** List of Transcription Factors that were differentially regulated in rice  
659 plant at 1<sup>st</sup>, 2<sup>nd</sup> and 5<sup>th</sup> day of *R. solani* infection.

660 **Supplemental Data Set 6.** Resistant genes in rice against three major diseases i.e., Bacterial  
661 Blight, Rice blast, Sheath Blight from PRGdb 3.0 database and manual curation of literatures.

662

663

## 664 **ACKNOWLEDGMENTS**

665 This research was supported by funding received from the Department of Biotechnology (DBT)  
666 (grant id - BT/PR24757/NER/95/843/2017) for the DBT-Twinning project- ‘Integrative system  
667 biology approach to identify the molecular response signatures in Rice during concurrent biotic  
668 (*Rhizoctonia solani*) and abiotic (heat) stresses’ to Dr. Pankaj Barah. P.B.K acknowledges the  
669 award of NASI-Platinum Jubilee Senior Scientist by the National Academy of Sciences, India.

670

671

## 672 **LITERATURE CITED**

673 **Barah P, Jayavelu ND, Mundy J, Bones AM** (2013) Genome scale transcriptional response  
674 diversity among ten ecotypes of *Arabidopsis thaliana* during heat stress. *Frontiers in plant*  
675 *science* **4**: 532

676 **Barah P, B N M, Jayavelu N, Sowdhamini R, Shameer K, Bones A** (2015) Transcriptional  
677 regulatory networks in *Arabidopsis thaliana* during single and combined stresses. *Nucleic*  
678 *Acids Research* **44**: 3147-3164

679 **Bera S, R. P. Purkayastha** (1999) Multicomponent Coordinated Defence Response of Rice to

- 680 Rhizoctonia Solani Causing Sheath Blight. *Current Science* **76**: 1376–1384
- 681 **Bhattacharya A, Khanale V, Char B** (2017) Plant circadian rhythm in stress signaling. *Indian*
- 682 *Journal of Plant physiology* **22**: 147-155
- 683 **Fukao T, Yeung E, Bailey-Serres J** (2010) The Submergence Tolerance Regulator SUB1A
- 684 Mediates Crosstalk between Submergence and Drought Tolerance in Rice. *The Plant Cell*
- 685 **23**: 412-427
- 686 **Ghosh S, Kanwar P, Jha G** (2017) Alterations in rice chloroplast integrity, photosynthesis and
- 687 metabolome associated with pathogenesis of *Rhizoctonia solani*. *Scientific Reports* **7**:
- 688 41610
- 689 **Grant C, Bailey T, Noble W** (2011) FIMO: scanning for occurrences of a given motif.
- 690 *Bioinformatics* **27**: 1017-1018
- 691 **Guo A, Chen X, Gao G, Zhang H, Zhu Q, Liu X, Zhong Y, Gu X, He K, Luo J** (2007)
- 692 *PlantTFDB: a comprehensive plant transcription factor database. Nucleic Acids Research*
- 693 **36**: D966-D969
- 694 **Helliwell EE, Wang Q, Yang Y** (2013) Transgenic rice with inducible ethylene production
- 695 exhibits broad-spectrum disease resistance to the fungal pathogens *Magnaporthe oryzae*
- 696 and *Rhizoctonia solani*. *Plant biotechnology journal* **11**: 33-42
- 697 **Jung KH, Lee J, Dardick C, Seo YS, Cao P, Canlas P, Phetsom J, Xu X, Ouyang S, An K,**
- 698 **et al** (2008) Identification and functional analysis of light- responsive unique genes and
- 699 gene family members in rice. *PLoS Genet* **4**: e1000164
- 700 **Karmakar S, Datta K, Molla K, Gayen D, Das K, Sarkar S, Datta S** (2019) Proteo-
- 701 metabolomic investigation of transgenic rice unravels metabolic alterations and
- 702 accumulation of novel proteins potentially involved in defence against *Rhizoctonia*
- 703 *solani*. *Scientific Reports* **9**: 1-16
- 704 **Karmakar S, Molla KA, Chanda PK, Sarkar SN, Datta SK, Datta K** (2016) Green tissue-
- 705 specific co-expression of chitinase and oxalate oxidase 4 genes in rice for enhanced
- 706 resistance against sheath blight. *Planta* **243**: 115-130
- 707 **Khong GN, Richaud F, Coudert Y, Pati PK, Santi C, Périn C, Breitler J-C, Meynard D,**
- 708 **Vinh DN, Guiderdoni E, et al** (2008) Modulating Rice Stress Tolerance by
- 709 Transcription Factors. *Biotechnology and Genetic Engineering Reviews* **25**: 381-404
- 710 **Kim D, Langmead B, Salzberg SL** (2015) HISAT: a fast spliced aligner with low memory
- 711 requirements. *Nature methods* **12**: 357-360.
- 712 **Kishi-Kaboshi M, Seo S, Takahashi A, Hirochika H** (2018) The MAMP-responsive MYB
- 713 transcription factors MYB30, MYB55 and MYB110 activate the HCAA synthesis
- 714 pathway and enhance immunity in rice. *Plant and Cell Physiology* **59**: 903-915.
- 715 **Kobayashi T, Mew T, Hashiba T** (1997) Relationship between Incidence of Rice Sheath Blight
- 716 and Primary Inoculum in the Philippines: Mycelia in Plant Debris and Sclerotia. *Japanese*
- 717 *Journal of Phytopathology* **63**: 324-327
- 718 **Kumar K, Rao KP, Sharma P, Sinha AK** (2008) Differential regulation of rice mitogen
- 719 activated protein kinase kinase (MKK) by abiotic stress. *Plant physiology and*
- 720 *biochemistry* **46**: 891-897
- 721 **Legnaioli T, Cuevas J, Mas P** (2009) TOC1 functions as a molecular switch connecting the
- 722 circadian clock with plant responses to drought. *The EMBO journal* **28**: 3745-3757



- 723 **Li H, Handsaker B, Wysoker A, Fennell T, Ruan J, Homer N, Marth G, Abecasis G,**  
724 **Durbin R** (2009) The Sequence Alignment/Map format and SAMtools. *Bioinformatics*  
725 **25**: 2078-2079
- 726 **Li N, Kong L, Zhou W, Zhang X, Wei S, Ding X, Chu Z** (2013) Overexpression of Os2H16  
727 enhances resistance to phytopathogens and tolerance to drought stress in rice. *Plant Cell*  
728 *Tissue Organ Cult* **115**: 429-441
- 729 **Liao Y, Smyth GK, Shi W** (2014) featureCounts: an efficient general purpose program for  
730 assigning sequence reads to genomic features. *Bioinformatics* **30**: 923-930
- 731 **Lilly JJ, Subramanian B** (2019) Gene network mediated by WRKY13 to regulate resistance  
732 against sheath infecting fungi in rice (*Oryza sativa* L.). *Plant Science* **280**: 269-282
- 733 **Lim H, Xie L** (2018) Target Gene Prediction of Transcription Factor Using a New  
734 Neighborhood-regularized Tri-factorization One-class Collaborative Filtering Algorithm.  
735 *dl.acm.org* **18**: 10
- 736 **Love MI, Huber W, Anders S** (2014) Moderated estimation of fold change and dispersion for  
737 RNA-seq data with DESeq2. *Genome biology* **15**: 1-21
- 738 **Wang R, Lu L, Pan X, Hu Z, Ling F, Yan Y, Liu Y, Lin Y** (2015) Functional analysis of  
739 OsPGIP1 in rice sheath blight resistance. *Plant molecular biology*. **87**: 181-191
- 740 **Luck J, Spackman M, Freeman A, TreBicki P, Griffiths W, Finlay K, Chakraborty S**  
741 (2011) Climate change and diseases of food crops. *Plant Pathology* **60**: 113–121
- 742 **Lv Y, Yang M, Hu D, Yang Z, Ma S, Li X, Xiong L** (2017) The OsMYB30 transcription factor  
743 suppresses cold tolerance by interacting with a JAZ protein and suppressing  $\beta$ -amylase  
744 expression. *Plant physiology* **173**: 1475-1491
- 745 **Maeda S, Dubouzet JG, Kondou Y, Jikumaru Y, Seo S, Oda K, Matsui M, Hirochika H,**  
746 **Mori M** (2019) The rice CYP78A gene BSR2 confers resistance to *Rhizoctonia solani*  
747 and affects seed size and growth in *Arabidopsis* and rice. *Scientific reports*. **9**: 1-4
- 748 **Majumdar S, Ghosh S, Glick BR, Dumbroff EB** (1991) Activities of chlorophyllase,  
749 phosphoenolpyruvate carboxylase and ribulose-1, 5-bisphosphate carboxylase in the  
750 primary leaves of soybean during senescence and drought. *Physiologia Plantarum* **81**:  
751 473-480
- 752 **Mao B, Liu X, Hu D, Li D** (2014) Co-expression of RCH10 and AGLU1 confers rice resistance  
753 to fungal sheath blight *Rhizoctonia solani* and blast *Magnorpathe oryzae* and reveals  
754 impact on seed germination. *World Journal of Microbiology and Biotechnology* **30**:  
755 1229-1238
- 756 **Meng X, Zhang S** (2013) MAPK cascades in plant disease resistance signaling. *Annual review*  
757 *of phytopathology* **51**: 245-266
- 758 **Mishra B, Kumar N, Mukhtar MS** (2019) Systems biology and machine learning in plant–  
759 pathogen interactions. *Molecular Plant-Microbe Interactions* **32**: 45-55
- 760 **Mutuku JM, Nose A** (2012) Changes in the contents of metabolites and enzyme activities in  
761 rice plants responding to *Rhizoctonia solani* Kuhn infection: activation of glycolysis and  
762 connection to phenylpropanoid pathway. *Plant and Cell Physiology* **53**: 1017-1032
- 763 **de Oliveira DM, Finger-Teixeira A, Rodrigues Mota T, Salvador VH, Moreira-Vilar FC,**  
764 **Correa Molinari HB, Craig Mitchell RA, Marchiosi R, Ferrarese-Filho O, Dantas**  
765 **dos Santos W** (2015) Ferulic acid: A key component in grass lignocellulose recalcitrance  
766 to hydrolysis. *Plant Biotechnology Journal* **13**: 1224-1232



- 767 **Pandian BA, Sathishraj R, Djanaguiraman M, Prasad PV, Jugulam M** (2020) Role of  
768 cytochrome P450 enzymes in plant stress response. *Antioxidants* **9**: 454
- 769 **Peng H, Chen Z, Fang Z, Zhou J, Xia Z, Gao L, Chen L, Li L, Li T, Zhai W, et al** (2015)  
770 Rice Xa21 primed genes and pathways that are critical for combating bacterial blight  
771 infection. *Scientific Reports* **5**: 12165
- 772 **Peng S, Huang J, Sheehy JE, Laza RC, Visperas RM, Zhong X, Centeno GS, Khush GS,**  
773 **Cassman KG** (2004) Rice yields decline with higher night temperature from global  
774 warming. *Proceedings of the National Academy of Sciences* **101**: 9971-9975.
- 775 **Peng X, Hu Y, Tang X, Zhou P, Deng X, Wang H, Guo Z** (2012) Constitutive expression of  
776 rice WRKY30 gene increases the endogenous jasmonic acid accumulation, PR gene  
777 expression and resistance to fungal pathogens in rice. *Planta* **236**: 1485–1498
- 778 **Peng X, Wang H, Jang JC, Xiao T, He H, Jiang D, Tang X** (2016) OsWRKY80-OsWRKY4  
779 module as a positive regulatory circuit in rice resistance against *Rhizoctonia solani*. *Rice*  
780 **9**:1-4
- 781 **Peng Yuan D, Feng Xu X, Hong W-J, Ting Wang S, Tong Jia X, Liu Y, Li S, Min Li Z, Sun**  
782 **Q, Mei Q, et al** (2020) Transcriptome analysis of rice leaves in response to *Rhizoctonia*  
783 *solani* infection and reveals a novel regulatory mechanism. *Plant Biotechnology Reports*  
784 **14**: 559-573
- 785 **Prathi N, Palit P, Madhu P, M R, Laha G, Balachandran S, Madhav M, Sundaram R,**  
786 **Mangrauthia S** (2018) Proteomic and transcriptomic approaches to identify resistance  
787 and susceptibility related proteins in contrasting rice genotypes infected with fungal  
788 pathogen *Rhizoctonia solani*. *Plant Physiology and Biochemistry* **130**: 258-266
- 789 **Qingzhong M, Zhiheng L, Heying W, Shushen Z, Songhong W** (2001) Research progress in  
790 rice sheath blight. *Journal of Shenyang Agricultural University* **32**: 376-81
- 791 **Rao KP, Richa TA, Kumar KU, Raghuram BA, Sinha AK** (2010) In silico analysis reveals  
792 75 members of mitogen-activated protein kinase kinase gene family in rice. *DNA*  
793 *research* **17**: 139-153
- 794 **Nelson GC, Rosegrant MW, Koo J, Robertson R, Sulser T, Zhu T, Ringler C, Msangi S,**  
795 **Palazzo A, Batka M, Magalhaes M** (2009) Climate change: Impact on agriculture and  
796 costs of adaptation. *Intl Food Policy Res Inst, Washington, DC*
- 797 **Richa K, Tiwari IM, Kumari M, Devanna BN, Sonah H, Kumari A, Nagar R, Sharma V,**  
798 **Botella JR, Sharma TR** (2016) Functional characterization of novel chitinase genes  
799 present in the sheath blight resistance QTL: qSBR11-1 in rice line tetep. *Frontiers in*  
800 *plant science* **7**: 244
- 801 **Roy N, Gaikwad M, Bhattacharyya DK, Barah P** (2020) Identification of Systems Level  
802 Molecular Signatures from Glioblastoma Multiforme Derived Extracellular Vesicles.  
803 *Journal of Molecular Neuroscience* **24**: 1-2
- 804 **Sahu A, Chowdhury HA, Gaikwad M, Chongtham C, Talukdar U, Phukan JK,**  
805 **Bhattacharyya DK, Barah P** (2020) Integrative network analysis identifies differential  
806 regulation of neuroimmune system in Schizophrenia and Bipolar disorder. *Brain,*  
807 *Behavior, & Immunity-Health* **2**: 100023
- 808 **Sahu A, Das A, Saikia K, Barah P** (2020) Temperature differentially modulates the  
809 transcriptome response in *Oryza sativa* to *Xanthomonas oryzae* pv. *oryzae* infection.

- 810 Genomics **112**: 4842-4852
- 811 **Sakai H, Lee SS, Tanaka T, Numa H, Kim J, Kawahara Y, Wakimoto H, Yang CC,**  
812 **Iwamoto M, Abe T, Yamada Y** (2013) Rice Annotation Project Database (RAP-DB): an  
813 integrative and interactive database for rice genomics. *Plant and Cell Physiology* **54**: e6
- 814 **Osuna-Cruz CM, Paytavi-Gallart A, Di Donato A, Sundesha V, Andolfo G, Aiese Cigliano**  
815 **R, Sanseverino W, Ercolano MR** (2018) PRGdb 3.0: a comprehensive platform for  
816 prediction and analysis of plant disease resistance genes. *Nucleic acids research* **46**:  
817 D1197-D1201.
- 818 **Sayari M, Babaeizad V, Ghanbari MA, Rahimian H** (2014) Expression of the pathogenesis  
819 related proteins, NH-1, PAL, and lipoxygenase in the iranian Tarom and Khazar rice  
820 cultivars, in reaction to *Rhizoctonia solani*—the causal agent of rice sheath blight. *Journal*  
821 *of Plant Protection Research* **54**
- 822 **Shi W, Zhao SL, Liu K, Sun YB, Ni ZB, Zhang GY, Tang HS, Zhu JW, Wan BJ, Sun HQ,**  
823 **Dai JY** (2020) Comparison of leaf transcriptome in response to *Rhizoctonia solani*  
824 infection between resistant and susceptible rice cultivars. *BMC genomics* **21**: 1-6
- 825 **Smaczniak C, Immink RG, Muiño JM, Blanvillain R, Busscher M, Busscher-Lange J, Dinh**  
826 **QP, Liu S, Westphal AH, Boeren S, Parcy F** (2012) Characterization of MADS-  
827 domain transcription factor complexes in *Arabidopsis* flower development. *Proceedings*  
828 *of the National Academy of Sciences* **109** :1560-1565
- 829 **Su G, Morris JH, Demchak B, Bader GD** (2014) Biological network exploration with  
830 Cytoscape 3. *Current protocols in bioinformatics* **47**: 8-13
- 831 **Taheri P, Tarighi S** (2010) Riboflavin induces resistance in rice against *Rhizoctonia solani* via  
832 jasmonate-mediated priming of phenylpropanoid pathway. *Journal of plant physiology.*  
833 **167**: 201-208
- 834 **Tamaoki D, Seo S, Yamada S, Kano A, Miyamoto A, Shishido H, Miyoshi S, Taniguchi S,**  
835 **Akimitsu K, Gomi K** (2013) Jasmonic acid and salicylic acid activate a common defense  
836 system in rice. *Plant signaling & behavior* **8**: e24260
- 837 **Thomas-Chollier M, Sand O, Turatsinze JV, Janky RS, Defrance M, Vervisch E, Brohee S,**  
838 **van Helden J** (2008) RSAT: regulatory sequence analysis tools. *Nucleic acids research.*  
839 **36**: W119-W127
- 840 **Venu RC, Jia Y, Gowda M, Jia MH, Jantasuriyarat C, Stahlberg E, Li H, Rhineheart A,**  
841 **Bodhireddy P, Singh P, et al** (2007) RL-SAGE and microarray analysis of the rice  
842 transcriptome after *Rhizoctonia solani* infection. *Molecular Genetics and Genomics* **278**:  
843 421–431
- 844 **Wang H, Meng J, Peng X, Tang X, Zhou P, Xiang J, Deng X** (2015a) Rice WRKY4 acts as a  
845 transcriptional activator mediating defense responses toward *Rhizoctonia solani*, the  
846 causing agent of rice sheath blight. *Plant Molecular Biology* **89**: 157–171
- 847 **Wang J, Qi M, Liu J, Zhang Y** (2015b) CARMO: A comprehensive annotation platform for  
848 functional exploration of rice multi-omics data. *The Plant Journal* **83**: 359–374
- 849 **Weirauch MT, Yang A, Albu M, Cote AG, Montenegro-Montero A, Drewe P, Najafabadi**  
850 **HS, Lambert SA, Mann I, Cook K, Zheng H** (2014) Determination and inference of  
851 eukaryotic transcription factor sequence specificity. *Cell* **158**: 1431-1443

- 852 **Xiao N, Wu Y, Pan C, Yu L, Chen Y, Liu G, Li Y, Zhang X, Wang Z, Dai Z, Liang C**  
853 (2017) Improving of rice blast resistances in japonica by pyramiding major R genes.  
854 *Frontiers in plant science* **7**: 1918
- 855 **Xie C, Mao X, Huang J, Ding Y, Wu J, Dong S, Kong L, Gao G, Li CY, Wei L** (2011)  
856 KOBAS 2.0: a web server for annotation and identification of enriched pathways and  
857 diseases. *Nucleic acids research* **39**: W316-W322
- 858 **Yuan Z, Zhang Y, Xu G, Bi D, Qu H, Zou X, Gao X, Yang H, He H, Wang X, et al** (2018)  
859 Comparative Transcriptome Analysis of *Rhizoctonia solani*-resistant and-Susceptible  
860 Rice Cultivars Reveals the Importance of Pathogen Recognition and Active Immune  
861 Responses in Host Resistance. *Journal of Plant Biology* **61**: 143-158
- 862 **Zhang J, Chen L, Fu C, Wang L, Liu H, Cheng Y, Li S, Deng Q, Wang S, Zhu J, Liang Y**  
863 (2017) Comparative transcriptome analyses of gene expression changes triggered by  
864 *Rhizoctonia solani* AG1 IA infection in resistant and susceptible rice varieties. *Frontiers*  
865 *in plant science*. **8**: 1422
- 866 **Zhang J, Zhao W, Fu R, Fu C, Wang L, Liu H, Li S, Deng Q, Wang S, Zhu J, et al** (2018)  
867 Comparison of gene co-networks reveals the molecular mechanisms of the rice (*Oryza*  
868 *sativa* L.) response to *Rhizoctonia solani* AG1 IA infection. *Functional and Integrative*  
869 *Genomics* **18**: 545-557
- 870 **Zhu T, Song F, Zheng Z** (2006) Molecular Characterization of the Rice Pathogenesis-related  
871 Protein, OsPR-4b, and Its Antifungal Activity Against *Rhizoctonia solani*. *Journal of*  
872 *Phytopathology* **154**: 378-384

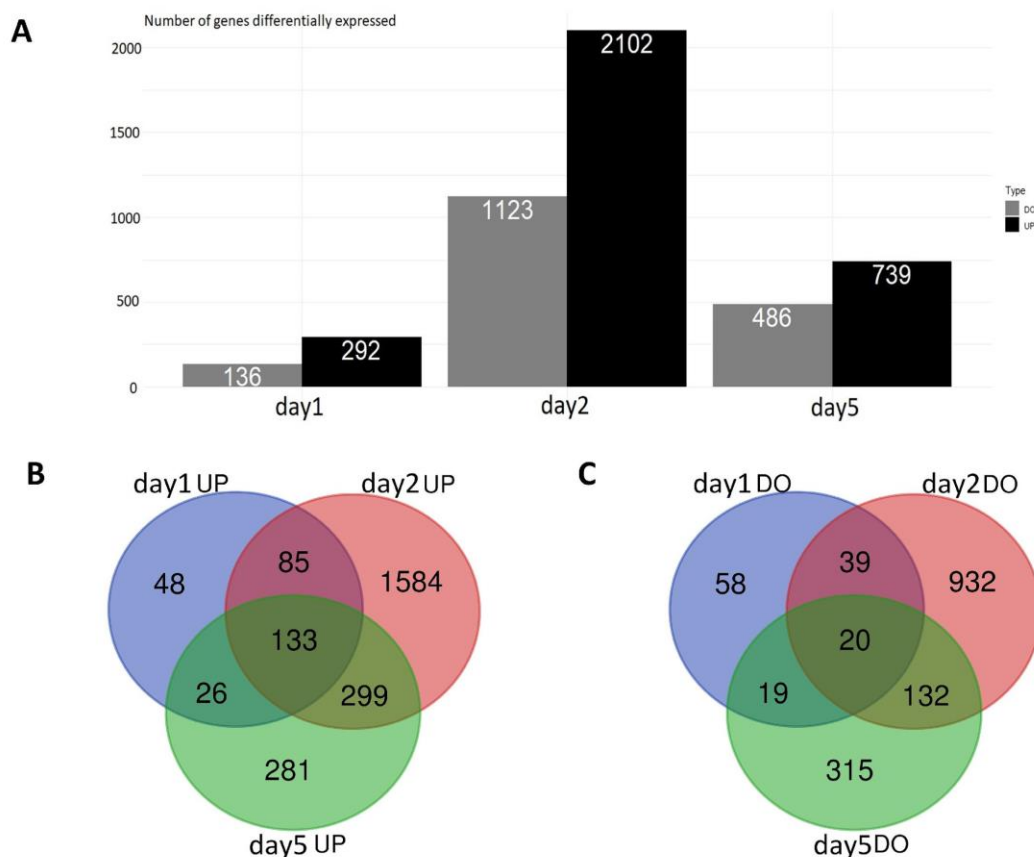

**Figure 1.** Differentially expressed genes (DEGs) in rice after *R. solani* infection. A, Bar plot showing the number of DEGs (up-regulated and down-regulated) identified in rice at 1<sup>st</sup>, 2<sup>nd</sup> and 5<sup>th</sup> day Time Points after *R. solani* infection. B, Venn diagram showing up-regulated DEGs expressed as common in day 1, 2 and 5 samples. A total of 133 genes were found to be up-regulated as common in all the three Time Points. C, Venn diagram showing down-regulated DEGs expressed as common in day 1, 2 and 5. A total of 20 genes were found to be down-regulated as common at all the three Time Points.

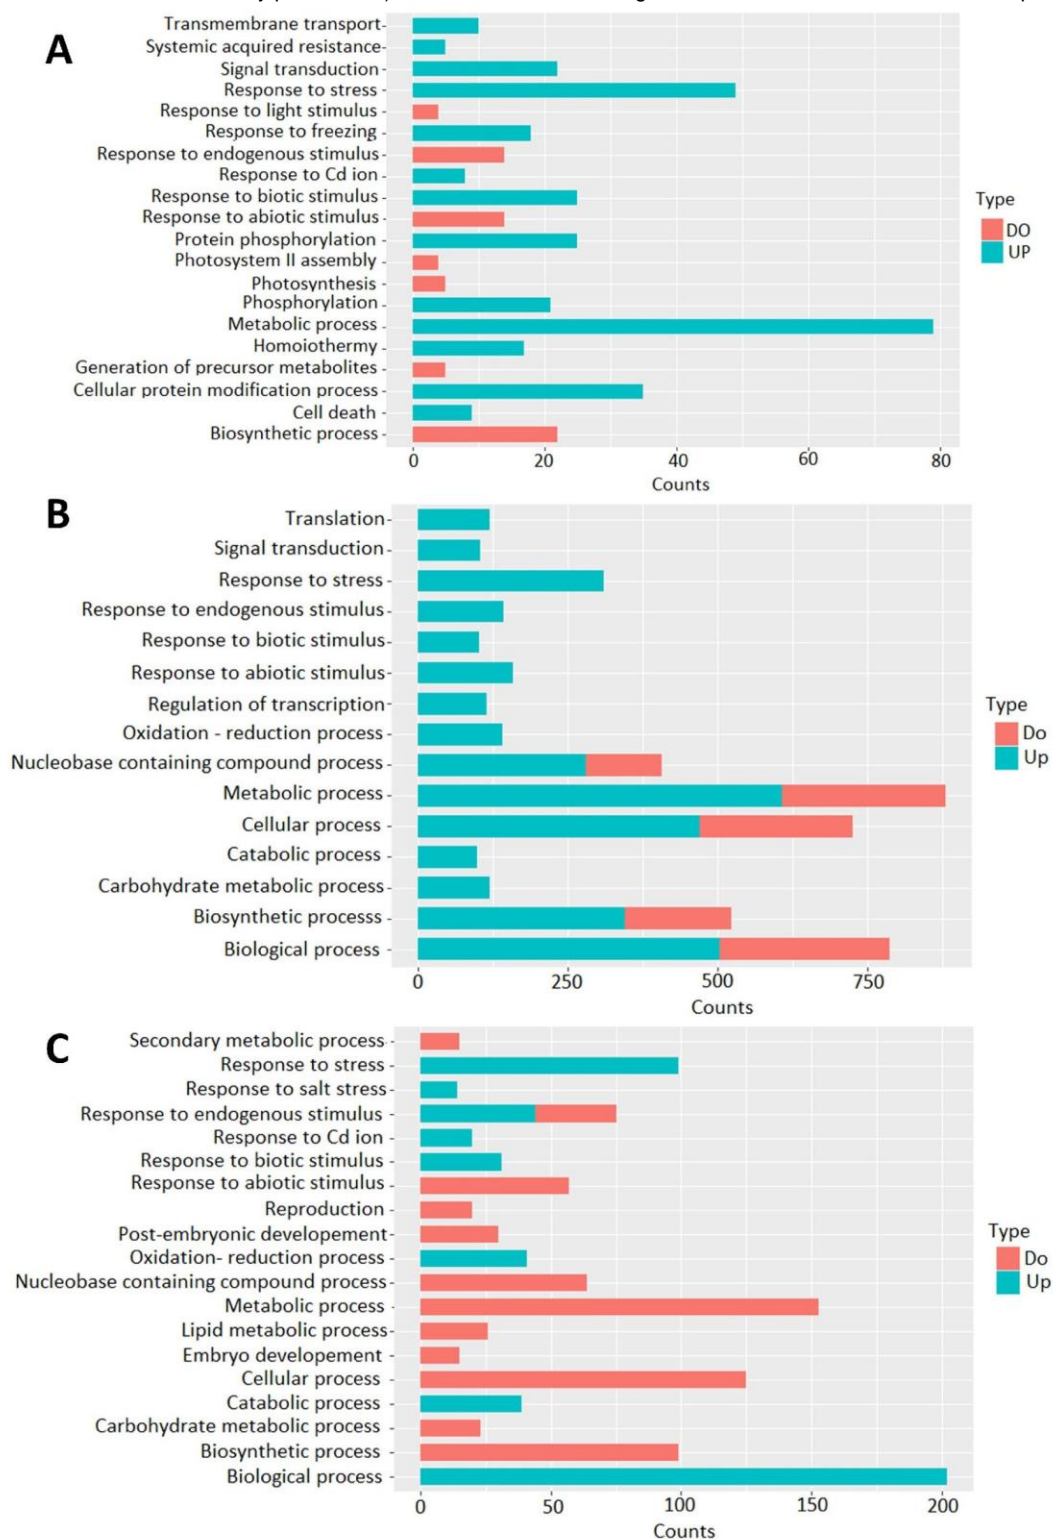

**Figure 2.** Gene Ontology (GO) analysis of significantly altered Biological Processes. Bar graphs showing the differential regulation of various Biological Processes and their expression type (Up= up-regulated and/or Do= down-regulated) in rice after *R. solani* infection at all the three Time Points i.e., day 1 (A), day2 (B)and day 5 (C).



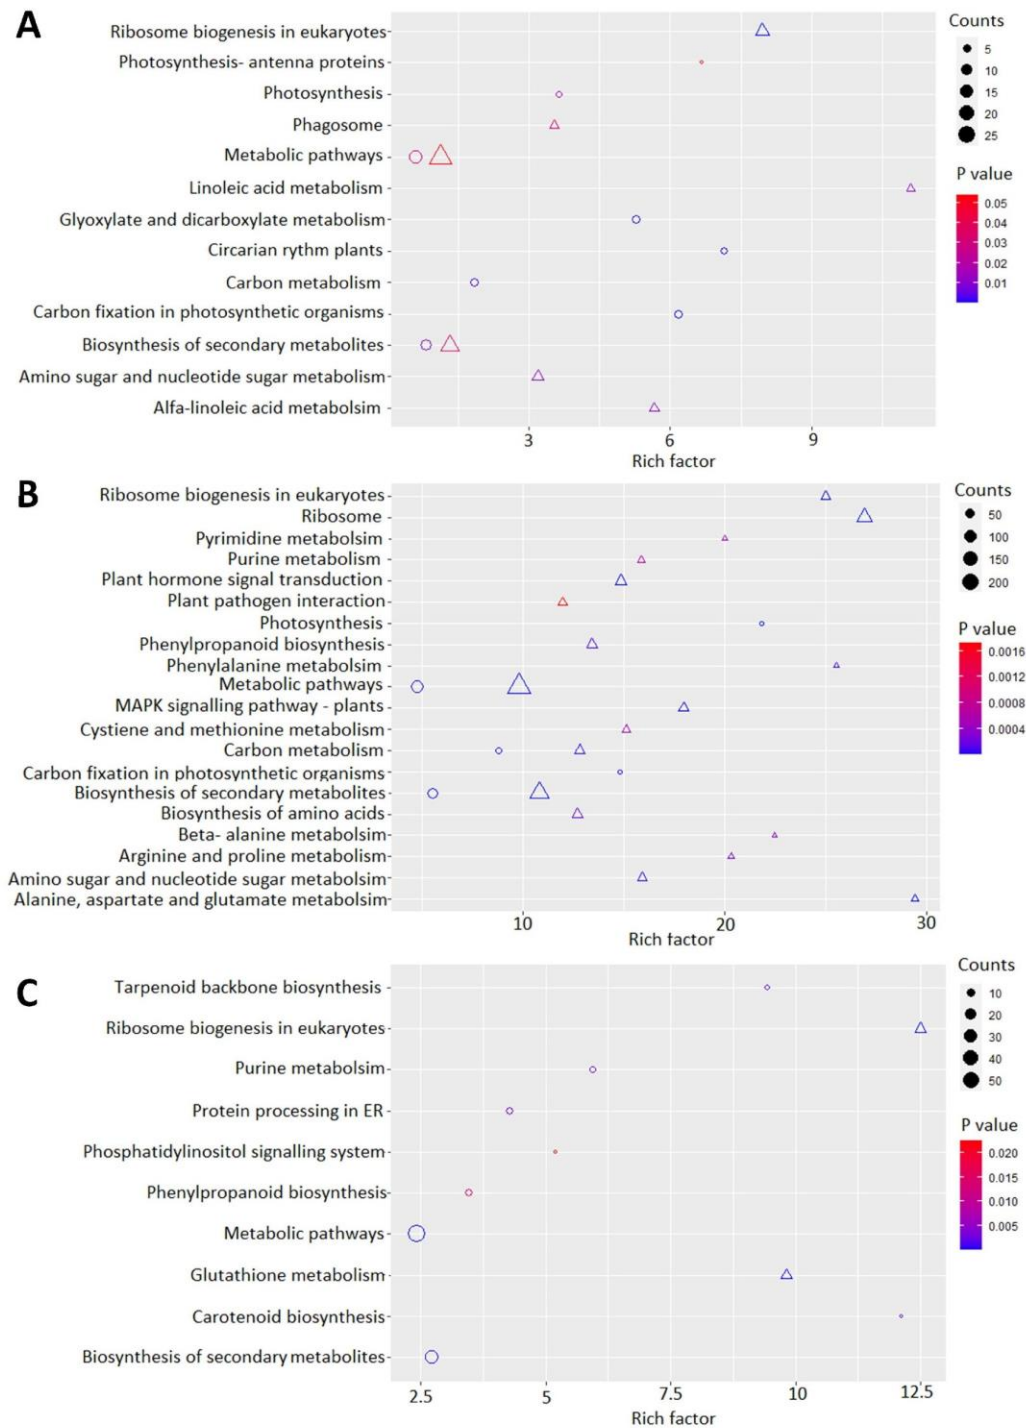

**Figure 3.** Pathway enrichment analysis. Dot plot showing top 20 significant regulatory pathways in rice response to *R. solani* infection at three Time Points i.e., day 1 (A), day 2 (B) and day 5 (C). Here, the size, shape and color represent the number of genes belonging to a particular pathway, pathway expression type (triangle represents up-regulation and circle represents down-regulation) and significance level respectively. Rich factor is the ratio of the number of genes in our DEG list annotated in a particular pathway to the total number of genes present in that pathway.



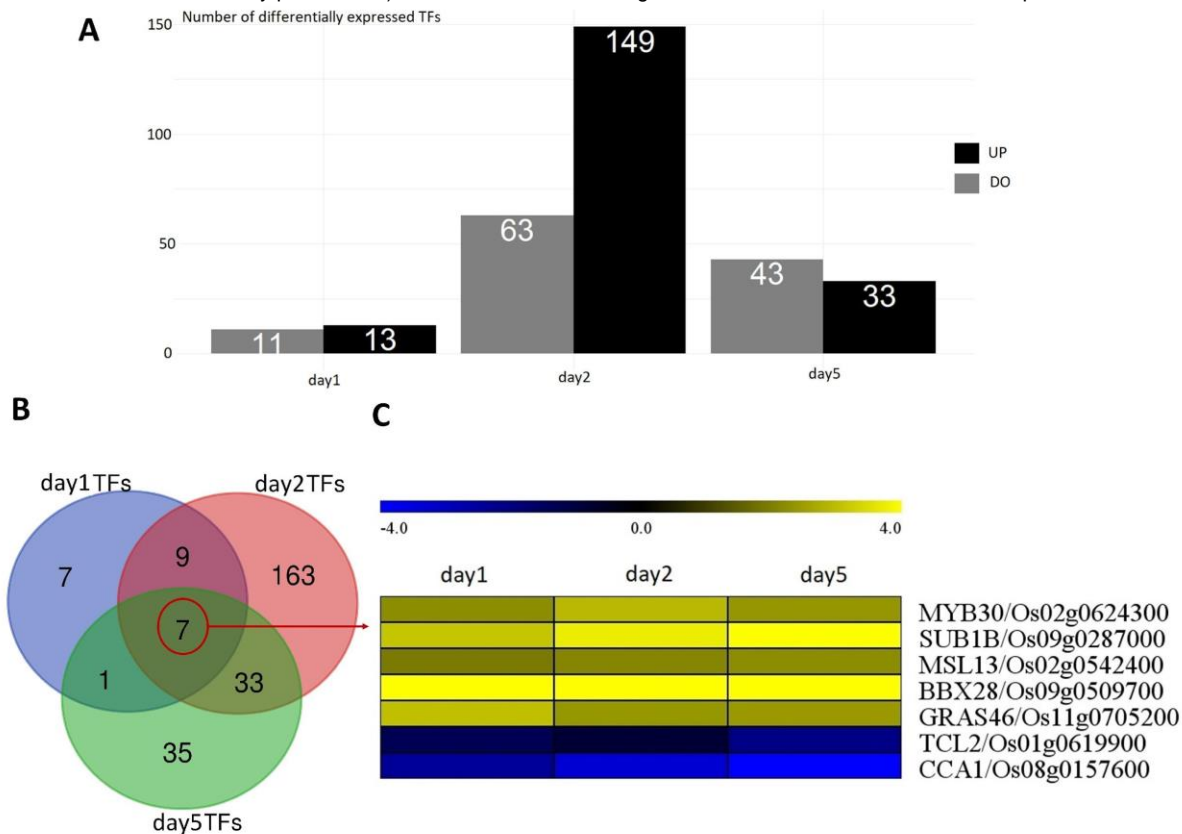

**Figure 4.** Rice Transcription Factors (TFs) responsive to *R. solani*. A, Bar graph showing the number of TFs differentially expressed in rice at 1, 2 and 5<sup>th</sup> day Time Points after *R. solani* infection. B, Venn Diagram showing 7 TFs that were commonly expressed in all the three Time Points. C, Heatmap showing the expression profile of the 7 TFs that were found to be commonly expressed at all the three Time Points.

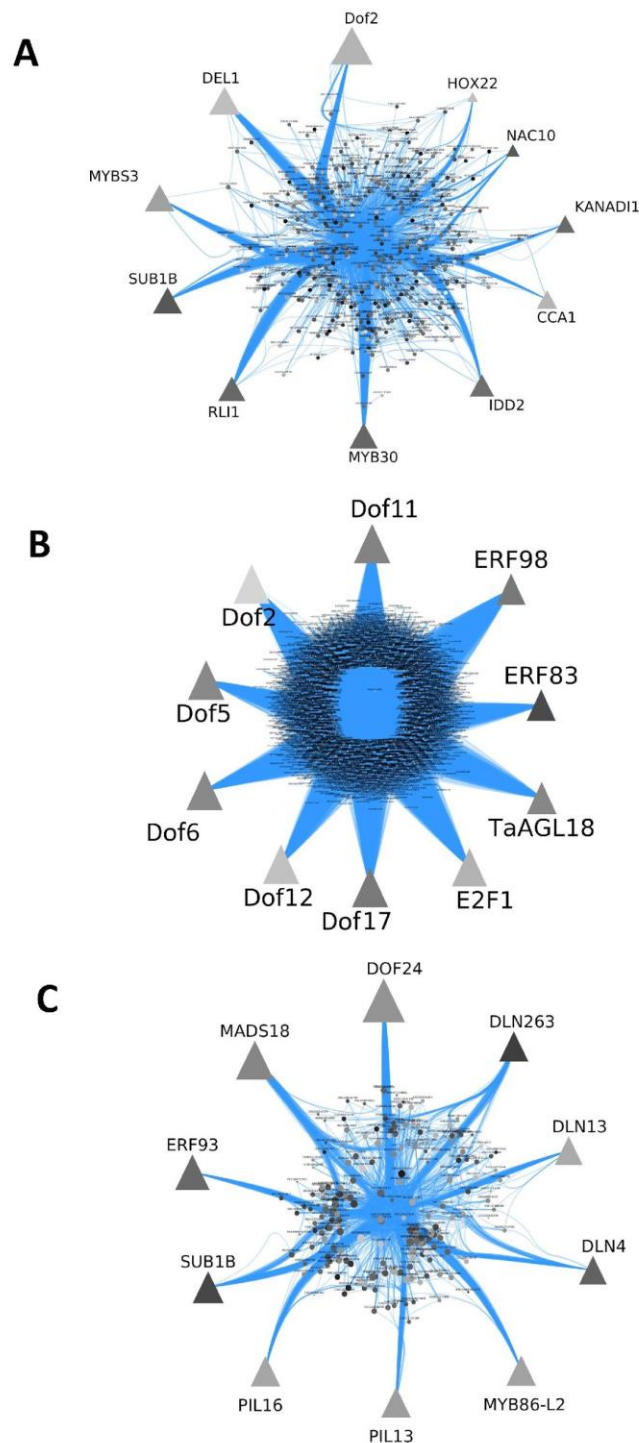

**Figure 5.** Topology of the Transcriptional Regulatory Networks (TRNs) in rice during *R. solani* infection. Transcription Factor – Target Gene (TF-TG) network of day 1 (A), day 2 (B) and day 5 (C) samples of rice after *R. solani* infection generated using motif scanning method. Here, the Target Gene (TG) represents genes and TF represents Transcription Factors differentially expressed in each of the Time Points.

## Parsed Citations

- Barah P, Jayavelu ND, Mundy J, Bones AM (2013) Genome scale transcriptional response diversity among ten ecotypes of *Arabidopsis thaliana* during heat stress. *Frontiers in plant science* 4: 532  
Google Scholar: [Author Only](#) [Title Only](#) [Author and Title](#)
- Barah P, B N M, Jayavelu N, Sowdhamini R, Shameer K, Bones A (2015) Transcriptional regulatory networks in *Arabidopsis thaliana* during single and combined stresses. *Nucleic Acids Research* 44: 3147-3164  
Google Scholar: [Author Only](#) [Title Only](#) [Author and Title](#)
- Bera S, R. P. Purkayastha (1999) Multicomponent Coordinated Defence Response of Rice to *Rhizoctonia Solani* Causing Sheath Blight. *Current Science* 76: 1376–1384  
Google Scholar: [Author Only](#) [Title Only](#) [Author and Title](#)
- Bhattacharya A, Khanale V, Char B (2017) Plant circadian rhythm in stress signaling. *Indian Journal of Plant physiology* 22: 147-155  
Google Scholar: [Author Only](#) [Title Only](#) [Author and Title](#)
- Fukao T, Yeung E, Bailey-Serres J (2010) The Submergence Tolerance Regulator SUB1A Mediates Crosstalk between Submergence and Drought Tolerance in Rice. *The Plant Cell* 23: 412-427  
Google Scholar: [Author Only](#) [Title Only](#) [Author and Title](#)
- Ghosh S, Kanwar P, Jha G (2017) Alterations in rice chloroplast integrity, photosynthesis and metabolome associated with pathogenesis of *Rhizoctonia solani*. *Scientific Reports* 7: 41610  
Google Scholar: [Author Only](#) [Title Only](#) [Author and Title](#)
- Grant C, Bailey T, Noble W (2011) FIMO: scanning for occurrences of a given motif. *Bioinformatics* 27: 1017-1018  
Google Scholar: [Author Only](#) [Title Only](#) [Author and Title](#)
- Guo A, Chen X, Gao G, Zhang H, Zhu Q, Liu X, Zhong Y, Gu X, He K, Luo J (2007) PlantTFDB: a comprehensive plant transcription factor database. *Nucleic Acids Research* 36: D966-D969  
Google Scholar: [Author Only](#) [Title Only](#) [Author and Title](#)
- Helliwell EE, Wang Q, Yang Y (2013) Transgenic rice with inducible ethylene production exhibits broad-spectrum disease resistance to the fungal pathogens *Magnaporthe oryzae* and *Rhizoctonia solani*. *Plant biotechnology journal* 11: 33-42  
Google Scholar: [Author Only](#) [Title Only](#) [Author and Title](#)
- Jung KH, Lee J, Dardick C, Seo YS, Cao P, Canlas P, Phetsom J, Xu X, Ouyang S, An K, et al (2008) Identification and functional analysis of light- responsive unique genes and gene family members in rice. *PLoS Genet* 4: e1000164  
Google Scholar: [Author Only](#) [Title Only](#) [Author and Title](#)
- Karmakar S, Datta K, Molla K, Gayen D, Das K, Sarkar S, Datta S (2019) Proteo-metabolomic investigation of transgenic rice unravels metabolic alterations and accumulation of novel proteins potentially involved in defence against *Rhizoctonia solani*. *Scientific Reports* 9: 1-16  
Google Scholar: [Author Only](#) [Title Only](#) [Author and Title](#)
- Karmakar S, Molla KA, Chanda PK, Sarkar SN, Datta SK, Datta K (2016) Green tissue-specific co-expression of chitinase and oxalate oxidase 4 genes in rice for enhanced resistance against sheath blight. *Planta* 243: 115-130  
Google Scholar: [Author Only](#) [Title Only](#) [Author and Title](#)
- Khong GN, Richaud F, Coudert Y, Pati PK, Santi C, Périn C, Breidler J-C, Meynard D, Vinh DN, Guiderdoni E, et al (2008) Modulating Rice Stress Tolerance by Transcription Factors. *Biotechnology and Genetic Engineering Reviews* 25: 381-404  
Google Scholar: [Author Only](#) [Title Only](#) [Author and Title](#)
- Kim D, Langmead B, Salzberg SL (2015) HISAT: a fast spliced aligner with low memory requirements. *Nature methods* 12: 357-360.  
Google Scholar: [Author Only](#) [Title Only](#) [Author and Title](#)
- Kishi-Kaboshi M, Seo S, Takahashi A, Hirochika H (2018) The MAMP-responsive MYB transcription factors MYB30, MYB55 and MYB110 activate the HCAA synthesis pathway and enhance immunity in rice. *Plant and Cell Physiology* 59: 903-915.  
Google Scholar: [Author Only](#) [Title Only](#) [Author and Title](#)
- Kobayashi T, Mew T, Hashiba T (1997) Relationship between Incidence of Rice Sheath Blight and Primary Inoculum in the Philippines: Mycelia in Plant Debris and Sclerotia. *Japanese Journal of Phytopathology* 63: 324-327  
Google Scholar: [Author Only](#) [Title Only](#) [Author and Title](#)
- Kumar K, Rao KP, Sharma P, Sinha AK (2008) Differential regulation of rice mitogen activated protein kinase kinase (MKK) by abiotic stress. *Plant physiology and biochemistry* 46: 891-897  
Google Scholar: [Author Only](#) [Title Only](#) [Author and Title](#)
- Legnaioli T, Cuevas J, Mas P (2009) TOC1 functions as a molecular switch connecting the circadian clock with plant responses to drought. *The EMBO journal* 28: 3745-3757  
Google Scholar: [Author Only](#) [Title Only](#) [Author and Title](#)
- Li H, Handsaker B, Wysoker A, Fennell T, Ruan J, Homer N, Marth G, Abecasis G, Durbin R (2009) The Sequence Alignment/Map format

**and SAMtools. Bioinformatics 25: 2078-2079**

Google Scholar: [Author Only](#) [Title Only](#) [Author and Title](#)

**Li N, Kong L, Zhou W, Zhang X, Wei S, Ding X, Chu Z (2013) Overexpression of Os2H16 enhances resistance to phytopathogens and tolerance to drought stress in rice. Plant Cell Tissue Organ Cult 115: 429-441**

Google Scholar: [Author Only](#) [Title Only](#) [Author and Title](#)

**Liao Y, Smyth GK, Shi W (2014) featureCounts: an efficient general purpose program for assigning sequence reads to genomic features. Bioinformatics 30: 923-930**

Google Scholar: [Author Only](#) [Title Only](#) [Author and Title](#)

**Lilly JJ, Subramanian B (2019) Gene network mediated by WRKY13 to regulate resistance against sheath infecting fungi in rice (*Oryza sativa* L.). Plant Science 280: 269-282**

Google Scholar: [Author Only](#) [Title Only](#) [Author and Title](#)

**Lim H, Xie L (2018) Target Gene Prediction of Transcription Factor Using a New Neighborhood-regularized Tri-factorization One-class Collaborative Filtering Algorithm. dl.acm.org 18: 10**

Google Scholar: [Author Only](#) [Title Only](#) [Author and Title](#)

**Love MI, Huber W, Anders S (2014) Moderated estimation of fold change and dispersion for RNA-seq data with DESeq2. Genome biology 15: 1-21**

Google Scholar: [Author Only](#) [Title Only](#) [Author and Title](#)

**Wang R, Lu L, Pan X, Hu Z, Ling F, Yan Y, Liu Y, Lin Y (2015) Functional analysis of OsPGIP1 in rice sheath blight resistance. Plant molecular biology. 87: 181-191**

Google Scholar: [Author Only](#) [Title Only](#) [Author and Title](#)

**Luck J, Spackman M, Freeman A, TreBicki P, Griffiths W, Finlay K, Chakraborty S (2011) Climate change and diseases of food crops. Plant Pathology 60: 113–121**

Google Scholar: [Author Only](#) [Title Only](#) [Author and Title](#)

**Lv Y, Yang M, Hu D, Yang Z, Ma S, Li X, Xiong L (2017) The OsMYB30 transcription factor suppresses cold tolerance by interacting with a JAZ protein and suppressing  $\beta$ -amylase expression. Plant physiology 173: 1475-1491**

Google Scholar: [Author Only](#) [Title Only](#) [Author and Title](#)

**Maeda S, Dubouzet JG, Kondou Y, Jikumaru Y, Seo S, Oda K, Matsui M, Hirochika H, Mori M (2019) The rice CYP78A gene BSR2 confers resistance to *Rhizoctonia solani* and affects seed size and growth in *Arabidopsis* and rice. Scientific reports. 9: 1-4**

Google Scholar: [Author Only](#) [Title Only](#) [Author and Title](#)

**Majumdar S, Ghosh S, Glick BR, Dumbroff EB (1991) Activities of chlorophyllase, phosphoenolpyruvate carboxylase and ribulose-1, 5-bisphosphate carboxylase in the primary leaves of soybean during senescence and drought. Physiologia Plantarum 81: 473-480**

Google Scholar: [Author Only](#) [Title Only](#) [Author and Title](#)

**Mao B, Liu X, Hu D, Li D (2014) Co-expression of RCH10 and AGLU1 confers rice resistance to fungal sheath blight *Rhizoctonia solani* and blast *Magnorpathe oryzae* and reveals impact on seed germination. World Journal of Microbiology and Biotechnology 30: 1229-1238**

Google Scholar: [Author Only](#) [Title Only](#) [Author and Title](#)

**Meng X, Zhang S (2013) MAPK cascades in plant disease resistance signaling. Annual review of phytopathology 51: 245-266**

Google Scholar: [Author Only](#) [Title Only](#) [Author and Title](#)

**Mishra B, Kumar N, Mukhtar MS (2019) Systems biology and machine learning in plant–pathogen interactions. Molecular Plant-Microbe Interactions 32: 45-55**

Google Scholar: [Author Only](#) [Title Only](#) [Author and Title](#)

**Mutuku JM, Nose A (2012) Changes in the contents of metabolites and enzyme activities in rice plants responding to *Rhizoctonia solani* Kuhn infection: activation of glycolysis and connection to phenylpropanoid pathway. Plant and Cell Physiology 53: 1017-1032**

Google Scholar: [Author Only](#) [Title Only](#) [Author and Title](#)

**de Oliveira DM, Finger-Teixeira A, Rodrigues Mota T, Salvador VH, Moreira-Vilar FC, Correa Molinari HB, Craig Mitchell RA, Marchiosi R, Ferrarese-Filho O, Dantas dos Santos W (2015) Ferulic acid: A key component in grass lignocellulose recalcitrance to hydrolysis. Plant Biotechnology Journal 13: 1224-1232**

Google Scholar: [Author Only](#) [Title Only](#) [Author and Title](#)

**Pandian BA, Sathishraj R, Djanaguiraman M, Prasad PV, Jugulam M (2020) Role of cytochrome P450 enzymes in plant stress response. Antioxidants 9: 454**

Google Scholar: [Author Only](#) [Title Only](#) [Author and Title](#)

**Peng H, Chen Z, Fang Z, Zhou J, Xia Z, Gao L, Chen L, Li L, Li T, Zhai W, et al (2015) Rice Xa21 primed genes and pathways that are critical for combating bacterial blight infection. Scientific Reports 5: 12165**

Google Scholar: [Author Only](#) [Title Only](#) [Author and Title](#)

**Peng S, Huang J, Sheehy JE, Laza RC, Visperas RM, Zhong X, Centeno GS, Khush GS, Cassman KG (2004) Rice yields decline with higher night temperature from global warming. Proceedings of the National Academy of Sciences 101: 9971-9975.**

Google Scholar: [Author Only](#) [Title Only](#) [Author and Title](#)

**Peng X, Hu Y, Tang X, Zhou P, Deng X, Wang H, Guo Z (2012) Constitutive expression of rice WRKY30 gene increases the endogenous jasmonic acid accumulation, PR gene expression and resistance to fungal pathogens in rice. *Planta* 236: 1485–1498**

Google Scholar: [Author Only](#) [Title Only](#) [Author and Title](#)

**Peng X, Wang H, Jang JC, Xiao T, He H, Jiang D, Tang X (2016) OsWRKY80-OsWRKY4 module as a positive regulatory circuit in rice resistance against *Rhizoctonia solani*. *Rice* 9:1-4**

Google Scholar: [Author Only](#) [Title Only](#) [Author and Title](#)

**Peng Yuan D, Feng Xu X, Hong W-J, Ting Wang S, Tong Jia X, Liu Y, Li S, Min Li Z, Sun Q, Mei Q, et al (2020) Transcriptome analysis of rice leaves in response to *Rhizoctonia solani* infection and reveals a novel regulatory mechanism. *Plant Biotechnology Reports* 14: 559-573**

Google Scholar: [Author Only](#) [Title Only](#) [Author and Title](#)

**Prathi N, Palit P, Madhu P, M R, Laha G, Balachandran S, Madhav M, Sundaram R, Mangrauthia S (2018) Proteomic and transcriptomic approaches to identify resistance and susceptibility related proteins in contrasting rice genotypes infected with fungal pathogen *Rhizoctonia solani*. *Plant Physiology and Biochemistry* 130: 258-266**

Google Scholar: [Author Only](#) [Title Only](#) [Author and Title](#)

**Qingzhong M, Zhiheng L, Heying W, Shushen Z, Songhong W (2001) Research progress in rice sheath blight. *Journal of Shenyang Agricultural University* 32: 376-81**

Google Scholar: [Author Only](#) [Title Only](#) [Author and Title](#)

**Rao KP, Richa TA, Kumar KU, Raghuram BA, Sinha AK (2010) In silico analysis reveals 75 members of mitogen-activated protein kinase kinase gene family in rice. *DNA research* 17: 139-153**

Google Scholar: [Author Only](#) [Title Only](#) [Author and Title](#)

**Nelson GC, Rosegrant MW, Koo J, Robertson R, Sulser T, Zhu T, Ringler C, Msangi S, Palazzo A, Batka M, Magalhaes M (2009) *Climate change: Impact on agriculture and costs of adaptation*. Intl Food Policy Res Inst, Washington, DC**

Google Scholar: [Author Only](#) [Title Only](#) [Author and Title](#)

**Richa K, Tiwari IM, Kumari M, Devanna BN, Sonah H, Kumari A, Nagar R, Sharma V, Botella JR, Sharma TR (2016) Functional characterization of novel chitinase genes present in the sheath blight resistance QTL: qSBR11-1 in rice line tetep. *Frontiers in plant science* 7: 244**

Google Scholar: [Author Only](#) [Title Only](#) [Author and Title](#)

**Roy N, Gaikwad M, Bhattacharyya DK, Barah P (2020) Identification of Systems Level Molecular Signatures from Glioblastoma Multiforme Derived Extracellular Vesicles. *Journal of Molecular Neuroscience* 24: 1-2**

Google Scholar: [Author Only](#) [Title Only](#) [Author and Title](#)

**Sahu A, Chowdhury HA, Gaikwad M, Chongtham C, Talukdar U, Phukan JK, Bhattacharyya DK, Barah P (2020) Integrative network analysis identifies differential regulation of neuroimmune system in Schizophrenia and Bipolar disorder. *Brain, Behavior, & Immunity-Health* 2: 100023**

Google Scholar: [Author Only](#) [Title Only](#) [Author and Title](#)

**Sahu A, Das A, Saikia K, Barah P (2020) Temperature differentially modulates the transcriptome response in *Oryza sativa* to *Xanthomonas oryzae* pv. *oryzae* infection. *Genomics* 112: 4842-4852**

Google Scholar: [Author Only](#) [Title Only](#) [Author and Title](#)

**Sakai H, Lee SS, Tanaka T, Numa H, Kim J, Kawahara Y, Wakimoto H, Yang CC, Iwamoto M, Abe T, Yamada Y (2013) Rice Annotation Project Database (RAP-DB): an integrative and interactive database for rice genomics. *Plant and Cell Physiology* 54: e6**

Google Scholar: [Author Only](#) [Title Only](#) [Author and Title](#)

**Osuna-Cruz CM, Paytuy-Gallart A, Di Donato A, Sundesha V, Andolfo G, Aiese Cigliano R, Sanseverino W, Ercolano MR (2018) PRGdb 3.0: a comprehensive platform for prediction and analysis of plant disease resistance genes. *Nucleic acids research* 46: D1197-D1201.**

Google Scholar: [Author Only](#) [Title Only](#) [Author and Title](#)

**Sayari M, Babaeizad V, Ghanbari MA, Rahimian H (2014) Expression of the pathogenesis related proteins, NH-1, PAL, and lipoxygenase in the Iranian Tarom and Khazar rice cultivars, in reaction to *Rhizoctonia solani*—the causal agent of rice sheath blight. *Journal of Plant Protection Research* 54**

Google Scholar: [Author Only](#) [Title Only](#) [Author and Title](#)

**Shi W, Zhao SL, Liu K, Sun YB, Ni ZB, Zhang GY, Tang HS, Zhu JW, Wan BJ, Sun HQ, Dai JY (2020) Comparison of leaf transcriptome in response to *Rhizoctonia solani* infection between resistant and susceptible rice cultivars. *BMC genomics* 21: 1-6**

Google Scholar: [Author Only](#) [Title Only](#) [Author and Title](#)

**Smaczniak C, Immink RG, Muiño JM, Blanvillain R, Busscher M, Busscher-Lange J, Dinh QP, Liu S, Westphal AH, Boeren S, Parcy F (2012) Characterization of MADS-domain transcription factor complexes in Arabidopsis flower development. *Proceedings of the National Academy of Sciences* 109 :1560-1565**

Google Scholar: [Author Only](#) [Title Only](#) [Author and Title](#)

**Su G, Morris JH, Demchak B, Bader GD (2014) Biological network exploration with Cytoscape 3. *Current protocols in bioinformatics* 47:**



8-13

Google Scholar: [Author Only](#) [Title Only](#) [Author and Title](#)

**Taheri P, Tarighi S (2010) Riboflavin induces resistance in rice against *Rhizoctonia solani* via jasmonate-mediated priming of phenylpropanoid pathway. *Journal of plant physiology*. 167: 201-208**

Google Scholar: [Author Only](#) [Title Only](#) [Author and Title](#)

**Tamaoki D, Seo S, Yamada S, Kano A, Miyamoto A, Shishido H, Miyoshi S, Taniguchi S, Akimitsu K, Gomi K (2013) Jasmonic acid and salicylic acid activate a common defense system in rice. *Plant signaling & behavior* 8: e24260**

Google Scholar: [Author Only](#) [Title Only](#) [Author and Title](#)

**Thomas-Chollier M, Sand O, Turatsinze JV, Janky RS, Defrance M, Vervisch E, Brohee S, van Helden J (2008) RSAT: regulatory sequence analysis tools. *Nucleic acids research*. 36: W119-W127**

Google Scholar: [Author Only](#) [Title Only](#) [Author and Title](#)

**Venu RC, Jia Y, Gowda M, Jia MH, Jantasuriyarat C, Stahlberg E, Li H, Rhineheart A, Boddhireddy P, Singh P, et al (2007) RL-SAGE and microarray analysis of the rice transcriptome after *Rhizoctonia solani* infection. *Molecular Genetics and Genomics* 278: 421-431**

Google Scholar: [Author Only](#) [Title Only](#) [Author and Title](#)

**Wang H, Meng J, Peng X, Tang X, Zhou P, Xiang J, Deng X (2015a) Rice WRKY4 acts as a transcriptional activator mediating defense responses toward *Rhizoctonia solani*, the causing agent of rice sheath blight. *Plant Molecular Biology* 89: 157-171**

Google Scholar: [Author Only](#) [Title Only](#) [Author and Title](#)

**Wang J, Qi M, Liu J, Zhang Y (2015b) CARMO: A comprehensive annotation platform for functional exploration of rice multi-omics data. *The Plant Journal* 83: 359-374**

Google Scholar: [Author Only](#) [Title Only](#) [Author and Title](#)

**Weirauch MT, Yang A, Albu M, Cote AG, Montenegro-Montero A, Drewe P, Najafabadi HS, Lambert SA, Mann I, Cook K, Zheng H (2014) Determination and inference of eukaryotic transcription factor sequence specificity. *Cell* 158: 1431-1443**

Google Scholar: [Author Only](#) [Title Only](#) [Author and Title](#)

**Xiao N, Wu Y, Pan C, Yu L, Chen Y, Liu G, Li Y, Zhang X, Wang Z, Dai Z, Liang C (2017) Improving of rice blast resistances in japonica by pyramiding major R genes. *Frontiers in plant science* 7: 1918**

Google Scholar: [Author Only](#) [Title Only](#) [Author and Title](#)

**Xie C, Mao X, Huang J, Ding Y, Wu J, Dong S, Kong L, Gao G, Li CY, Wei L (2011) KOBAS 2.0: a web server for annotation and identification of enriched pathways and diseases. *Nucleic acids research* 39: W316-W322**

Google Scholar: [Author Only](#) [Title Only](#) [Author and Title](#)

**Yuan Z, Zhang Y, Xu G, Bi D, Qu H, Zou X, Gao X, Yang H, He H, Wang X, et al (2018) Comparative Transcriptome Analysis of *Rhizoctonia solani*-resistant and -susceptible Rice Cultivars Reveals the Importance of Pathogen Recognition and Active Immune Responses in Host Resistance. *Journal of Plant Biology* 61: 143-158**

Google Scholar: [Author Only](#) [Title Only](#) [Author and Title](#)

**Zhang J, Chen L, Fu C, Wang L, Liu H, Cheng Y, Li S, Deng Q, Wang S, Zhu J, Liang Y (2017) Comparative transcriptome analyses of gene expression changes triggered by *Rhizoctonia solani* AG1 IA infection in resistant and susceptible rice varieties. *Frontiers in plant science*. 8: 1422**

Google Scholar: [Author Only](#) [Title Only](#) [Author and Title](#)

**Zhang J, Zhao W, Fu R, Fu C, Wang L, Liu H, Li S, Deng Q, Wang S, Zhu J, et al (2018) Comparison of gene co-networks reveals the molecular mechanisms of the rice (*Oryza sativa* L.) response to *Rhizoctonia solani* AG1 IA infection. *Functional and Integrative Genomics* 18: 545-557**

Google Scholar: [Author Only](#) [Title Only](#) [Author and Title](#)

**Zhu T, Song F, Zheng Z (2006) Molecular Characterization of the Rice Pathogenesis-related Protein, OsPR-4b, and Its Antifungal Activity Against *Rhizoctonia solani*. *Journal of Phytopathology* 154: 378-384**

Google Scholar: [Author Only](#) [Title Only](#) [Author and Title](#)
